# Supplementary material
Source: ML conference proceedings conference paper supplement (https://openreview.net/forum?id=2qm4sB6BbS)

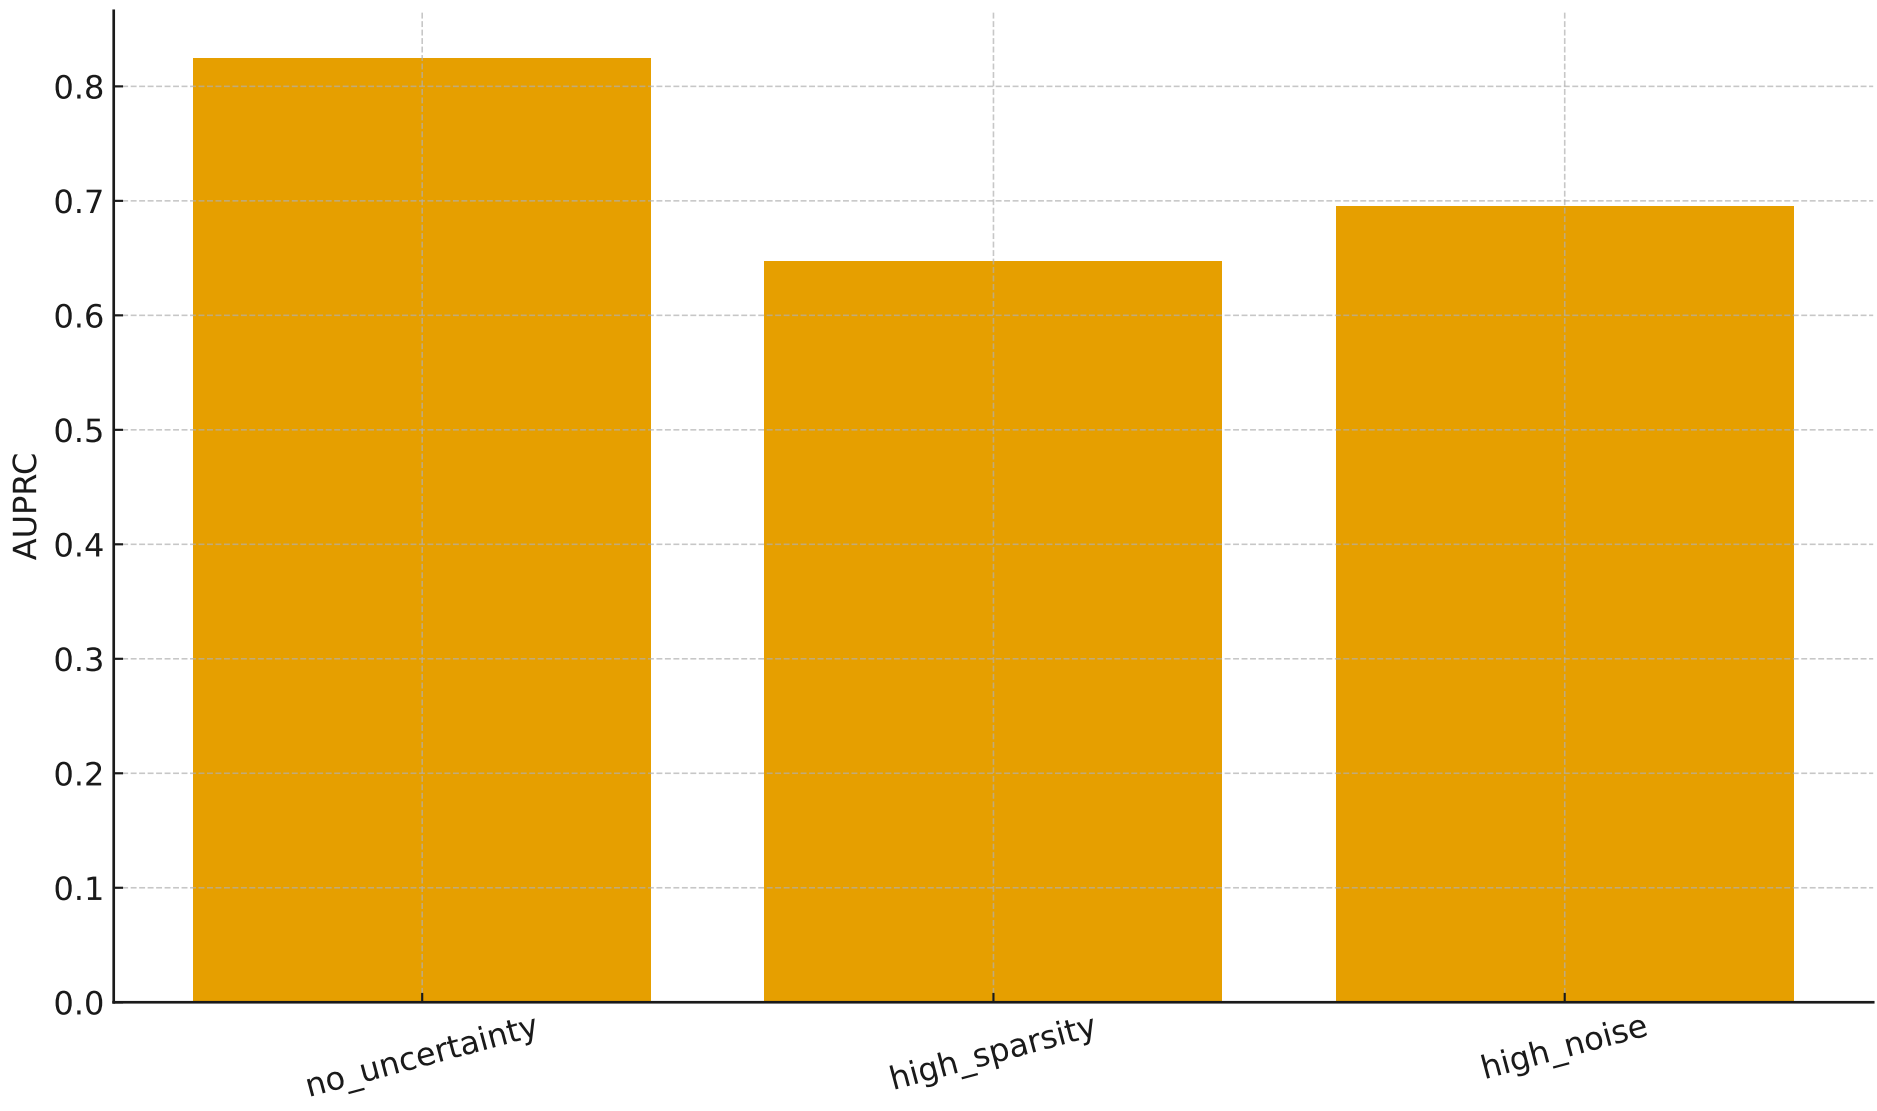

Supplement: supplementary_material [file ablations_auprc.pdf › A4S25_anonymous_1234/paper/figures/ablations_auprc.pdf]

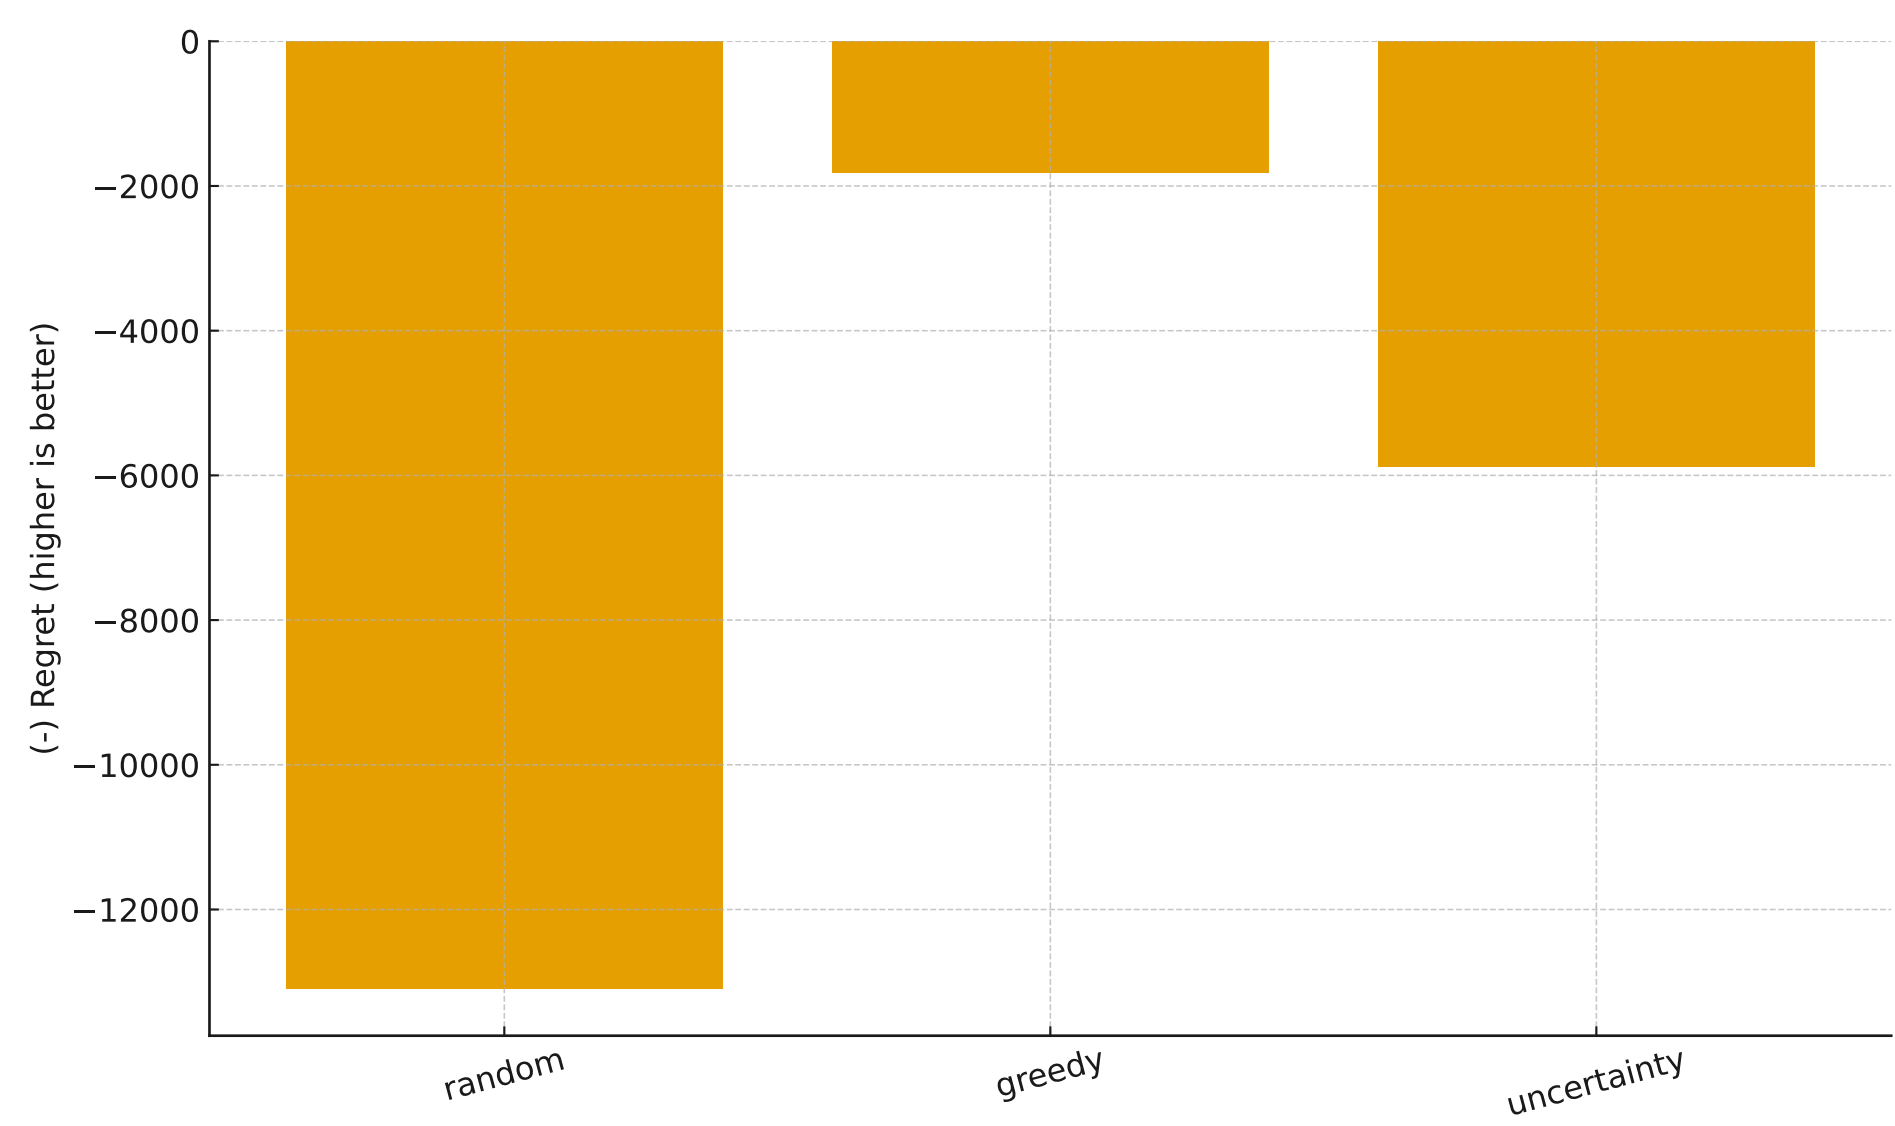

Supplement: supplementary_material [file bar_regret_main.pdf › A4S25_anonymous_1234/paper/figures/bar_regret_main.pdf]

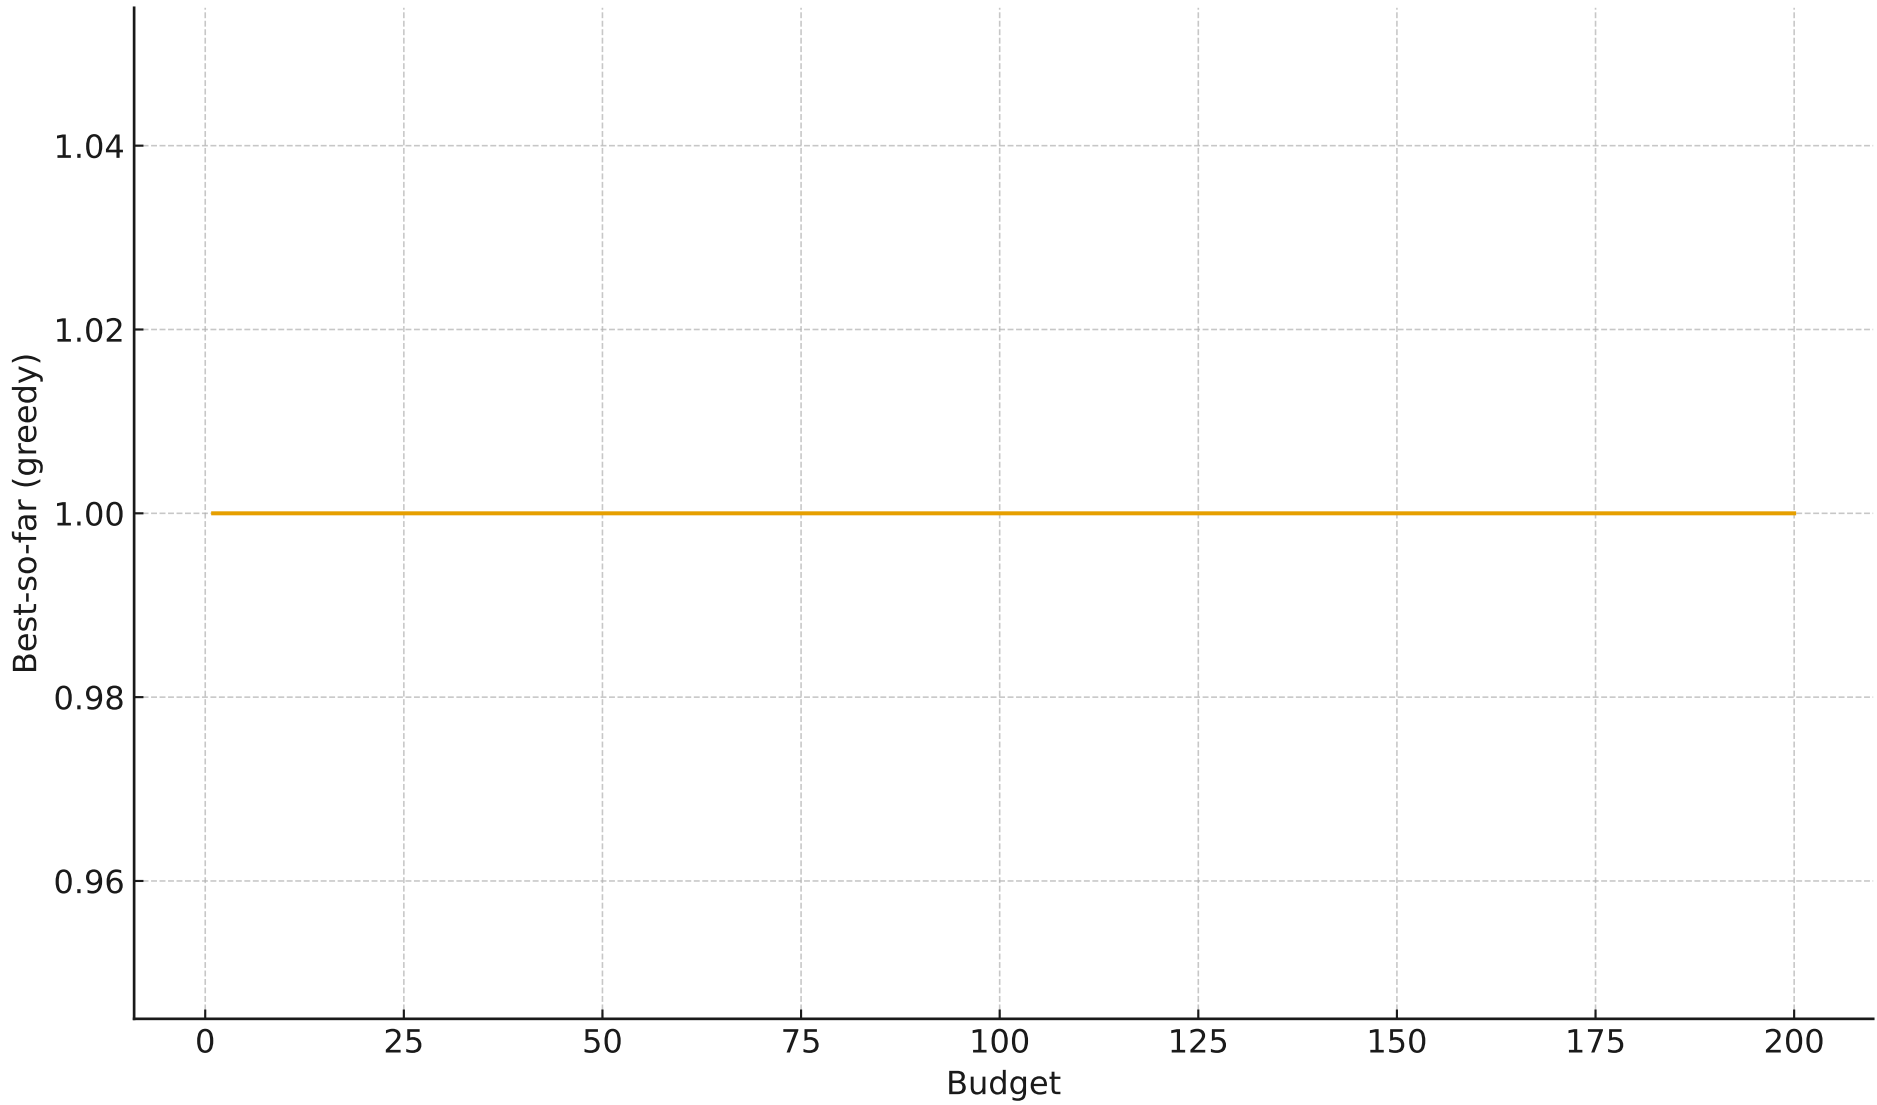

Supplement: supplementary_material [file curve_greedy.pdf › A4S25_anonymous_1234/paper/figures/curve_greedy.pdf]

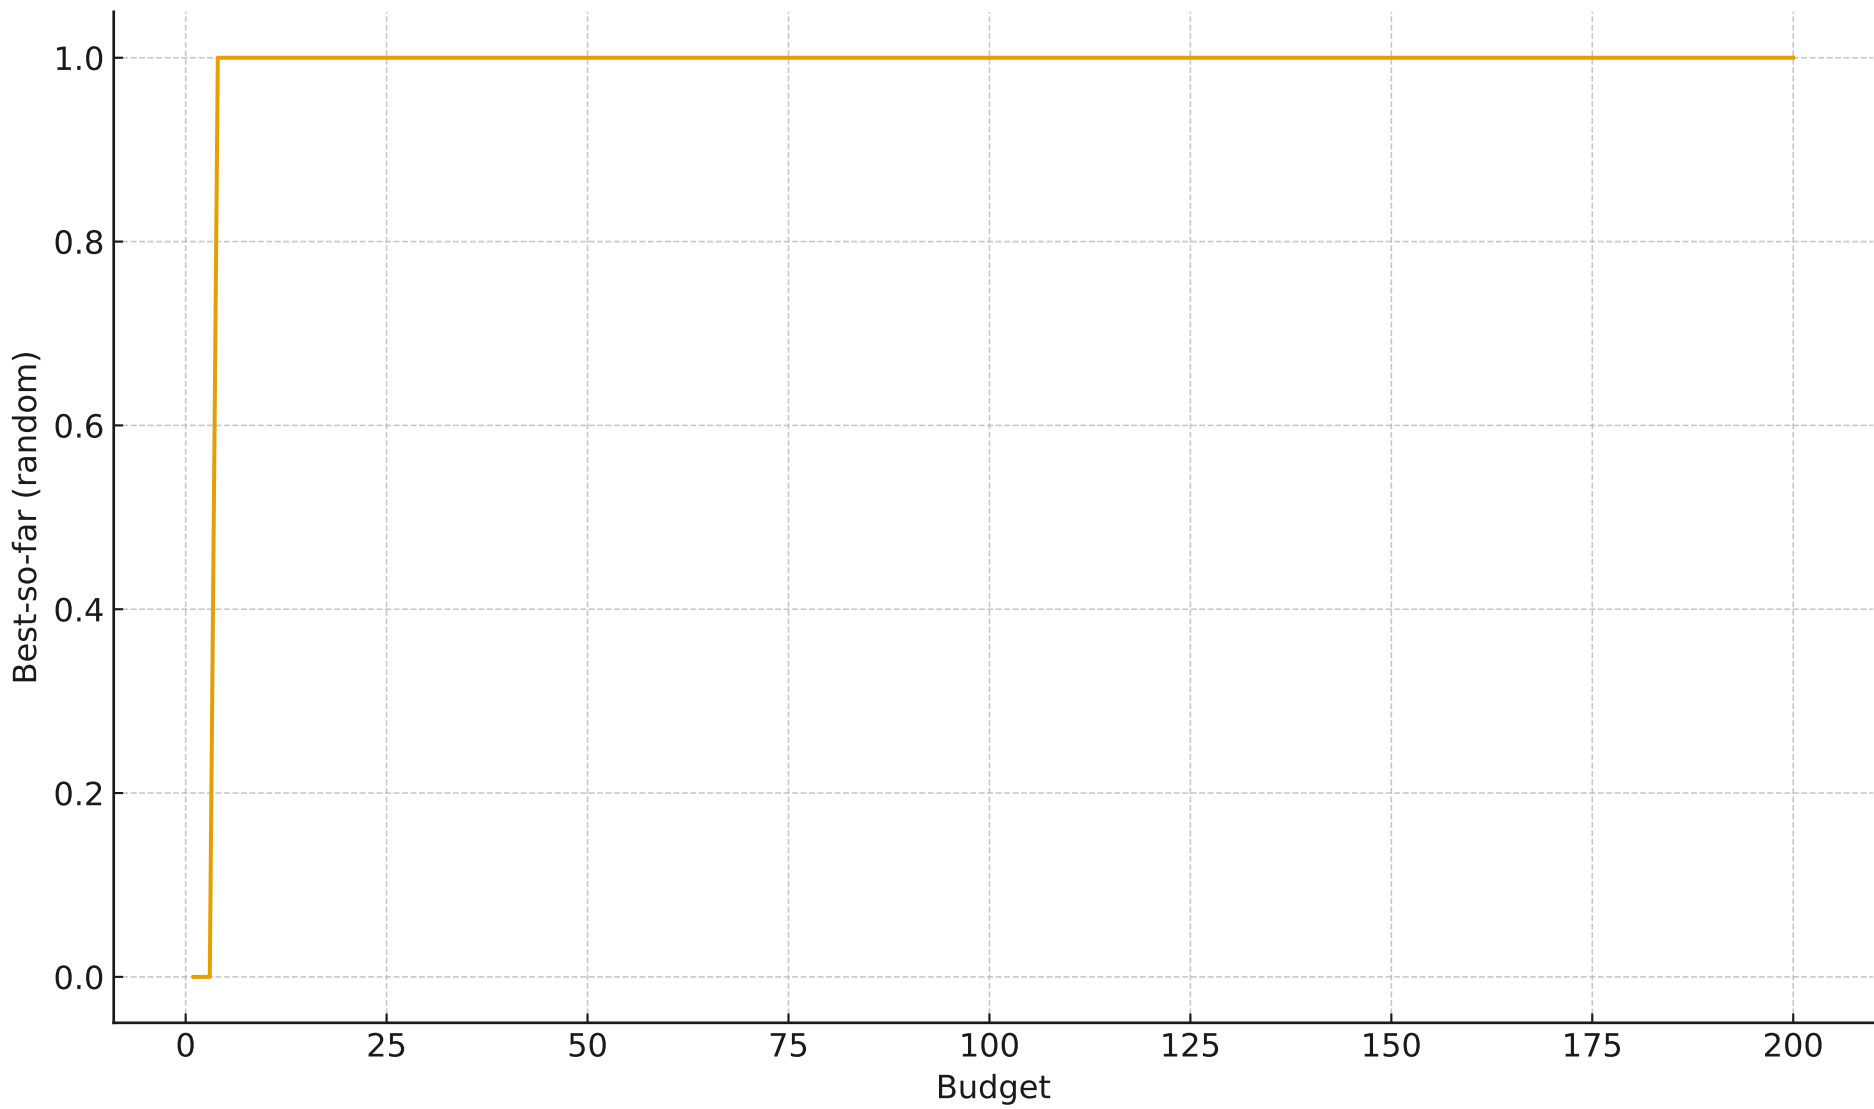

Supplement: supplementary_material [file curve_random.pdf › A4S25_anonymous_1234/paper/figures/curve_random.pdf]

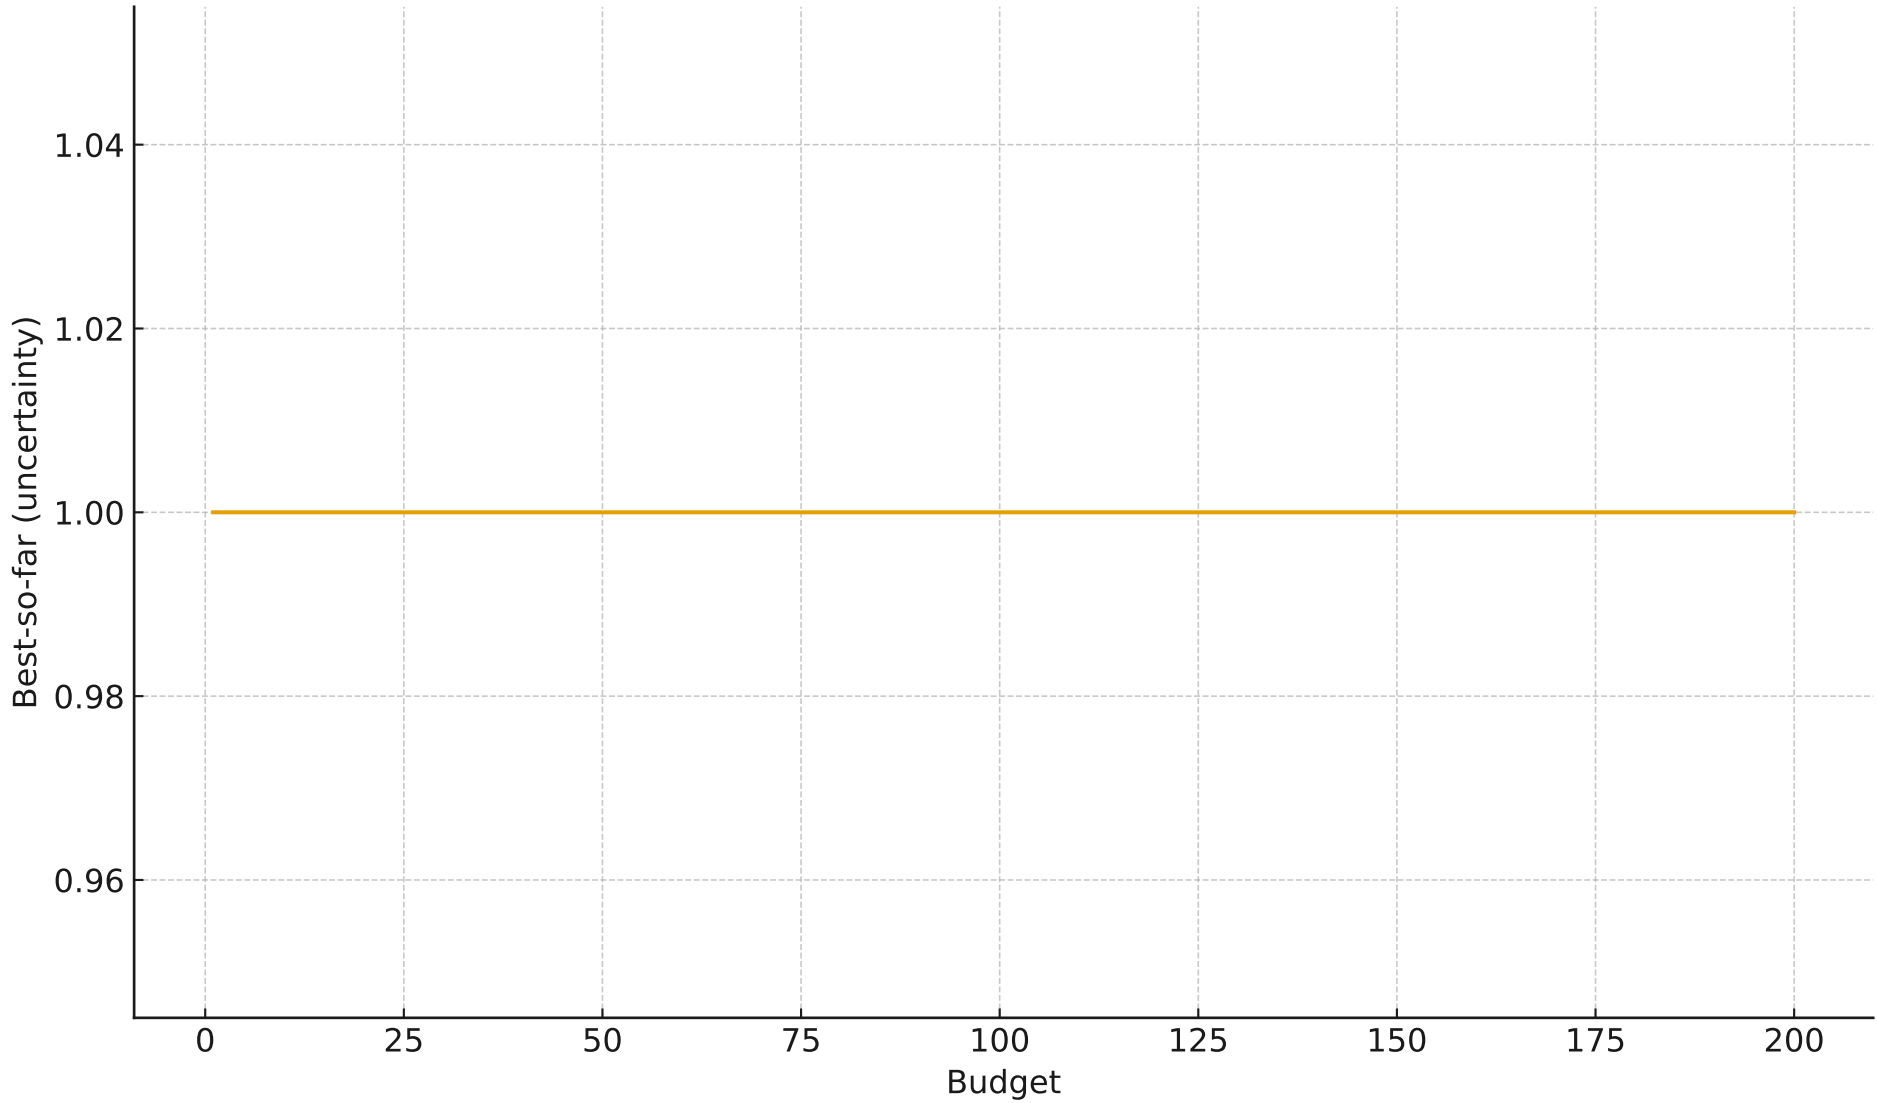

Supplement: supplementary_material [file curve_uncertainty.pdf › A4S25_anonymous_1234/paper/figures/curve_uncertainty.pdf]

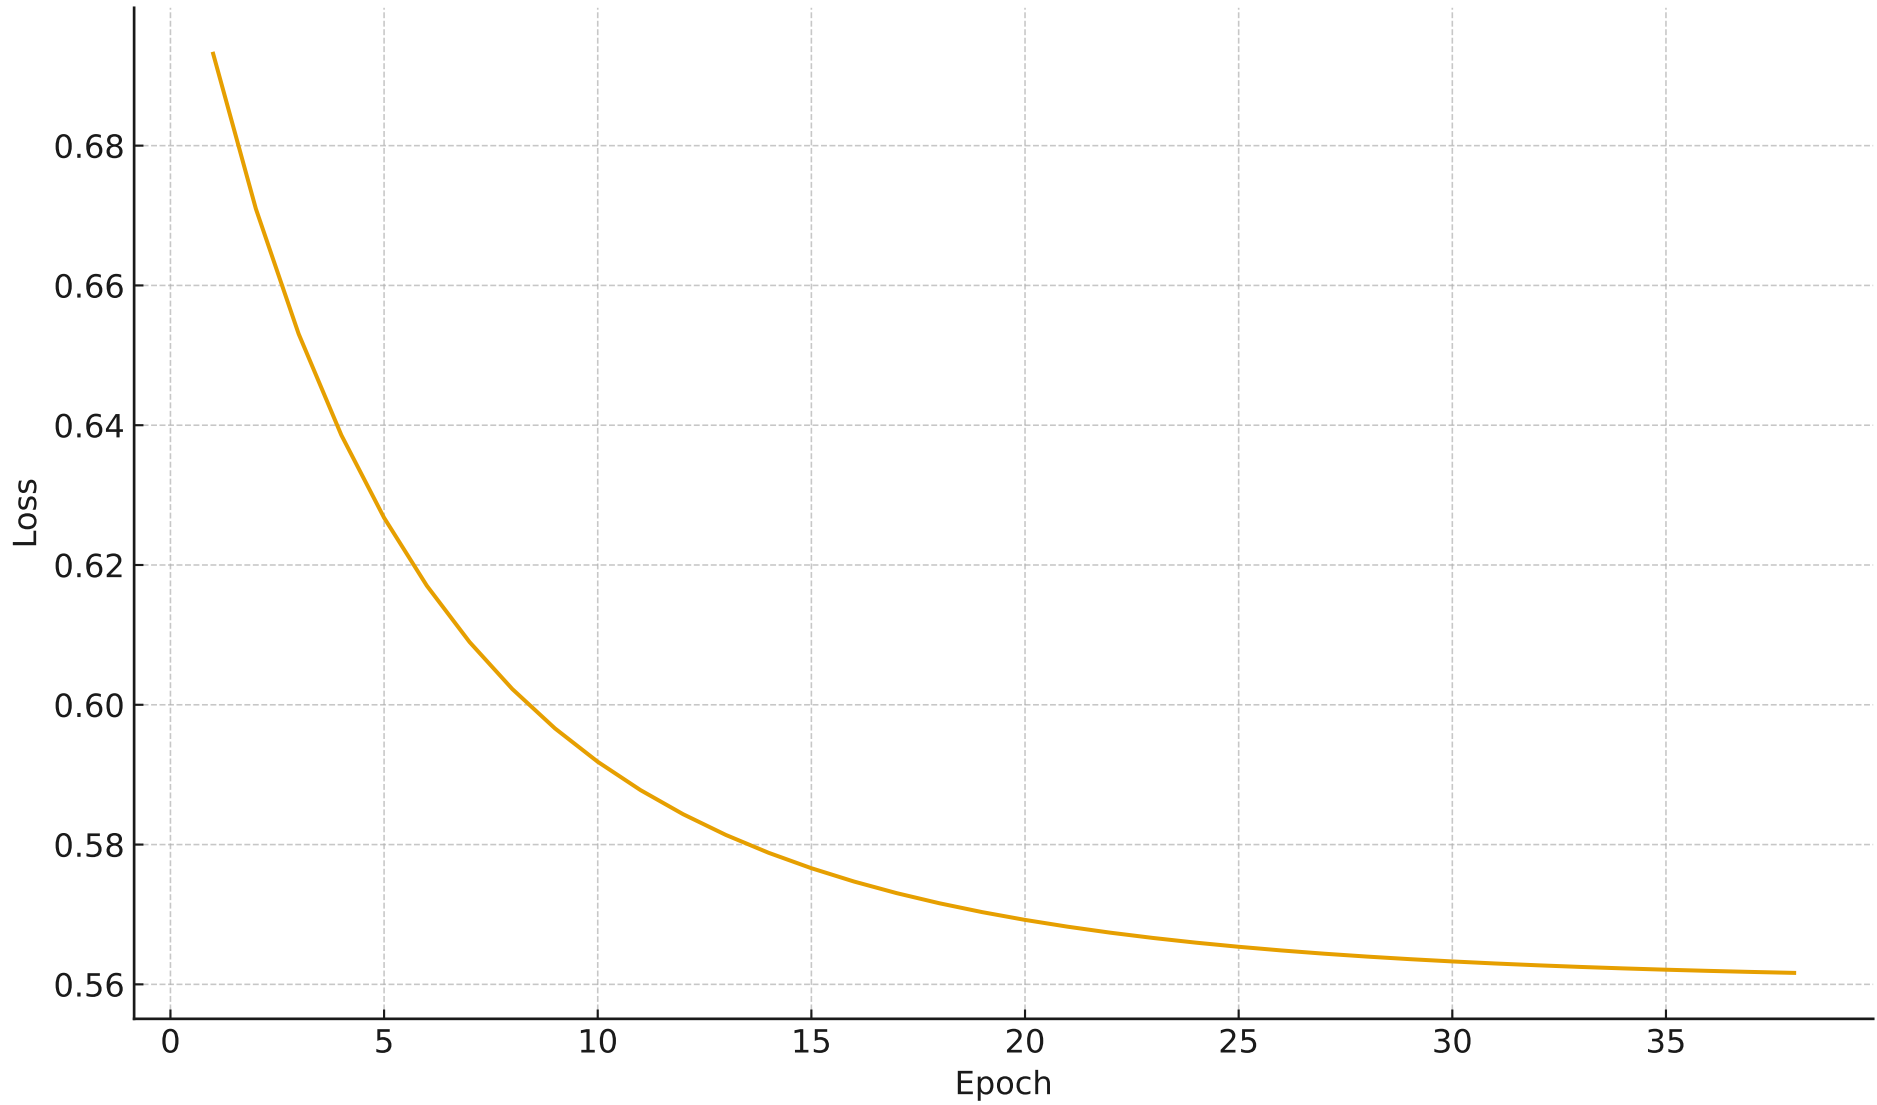

Supplement: supplementary_material [file loss_abl_high_noise.pdf › A4S25_anonymous_1234/paper/figures/loss_abl_high_noise.pdf]

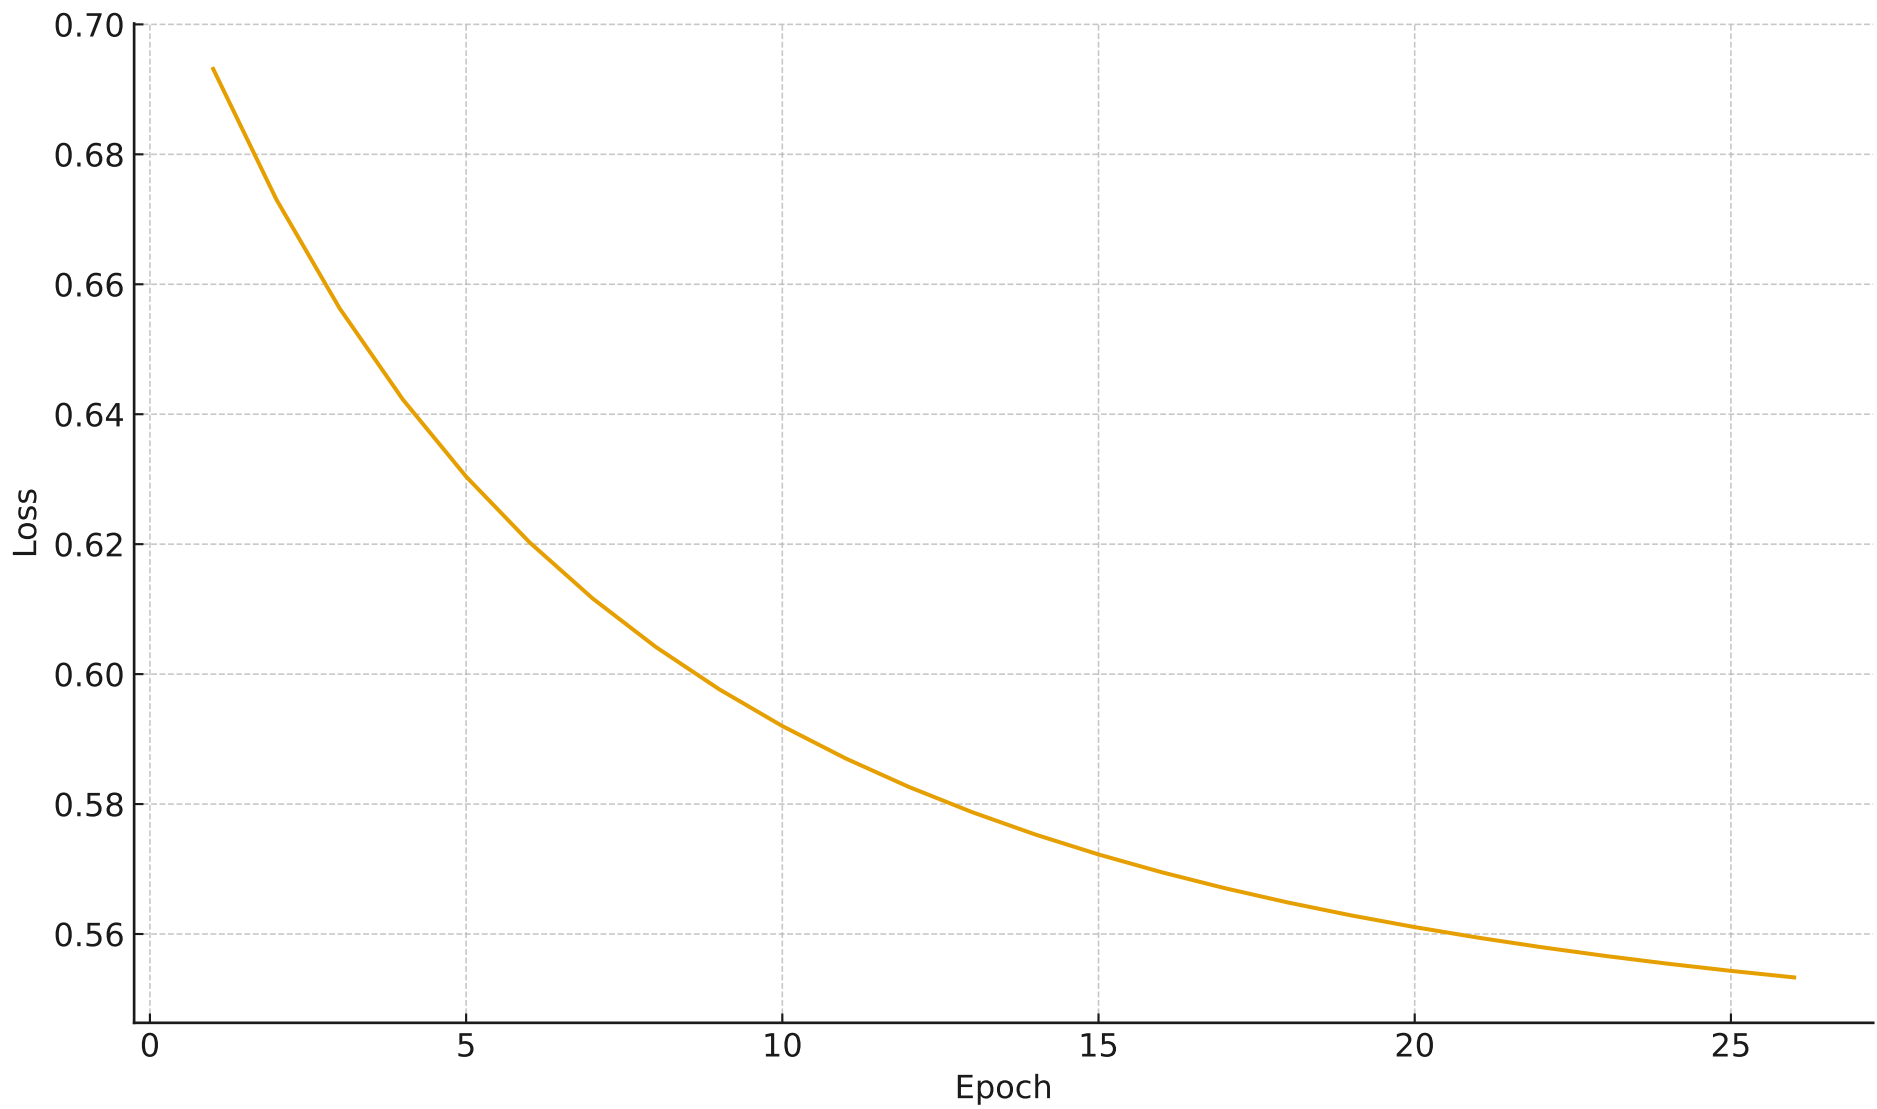

Supplement: supplementary_material [file loss_abl_high_sparsity.pdf › A4S25_anonymous_1234/paper/figures/loss_abl_high_sparsity.pdf]

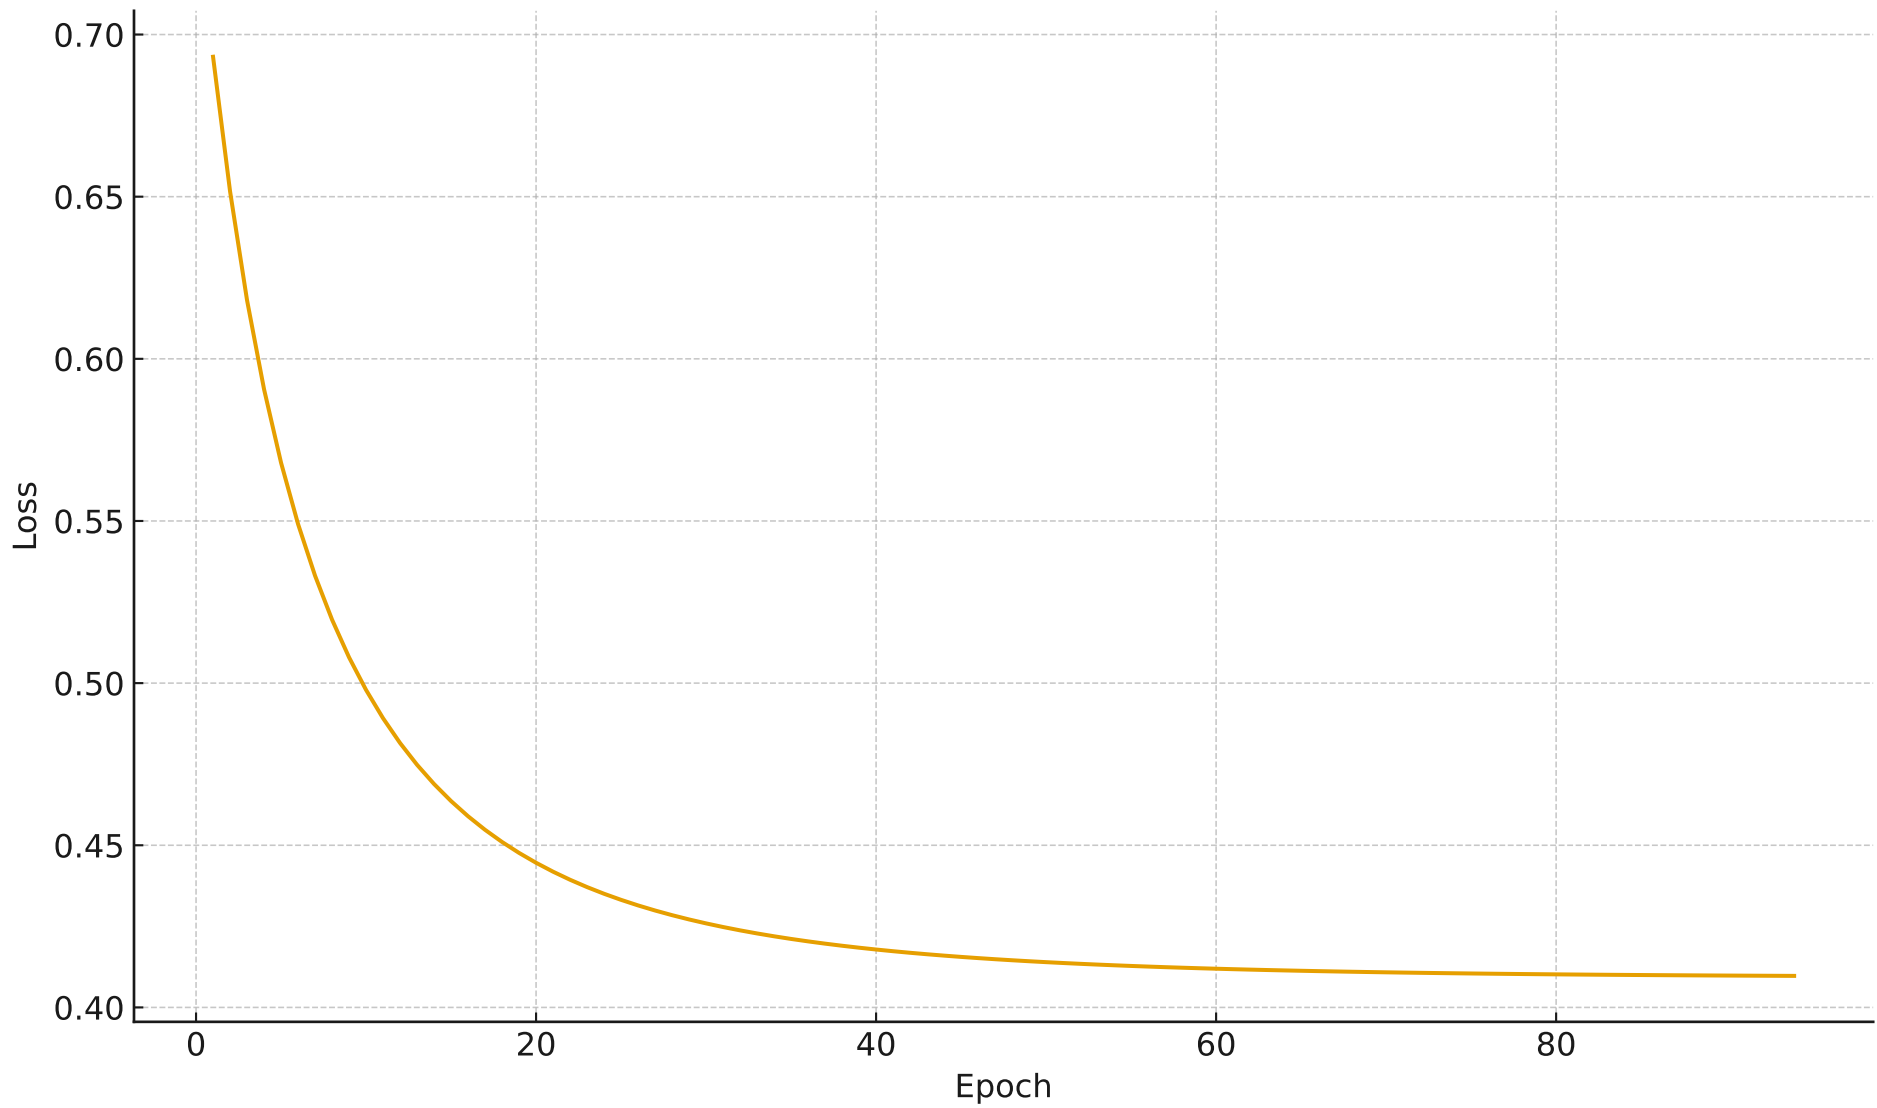

Supplement: supplementary_material [file loss_abl_no_uncertainty.pdf › A4S25_anonymous_1234/paper/figures/loss_abl_no_uncertainty.pdf]

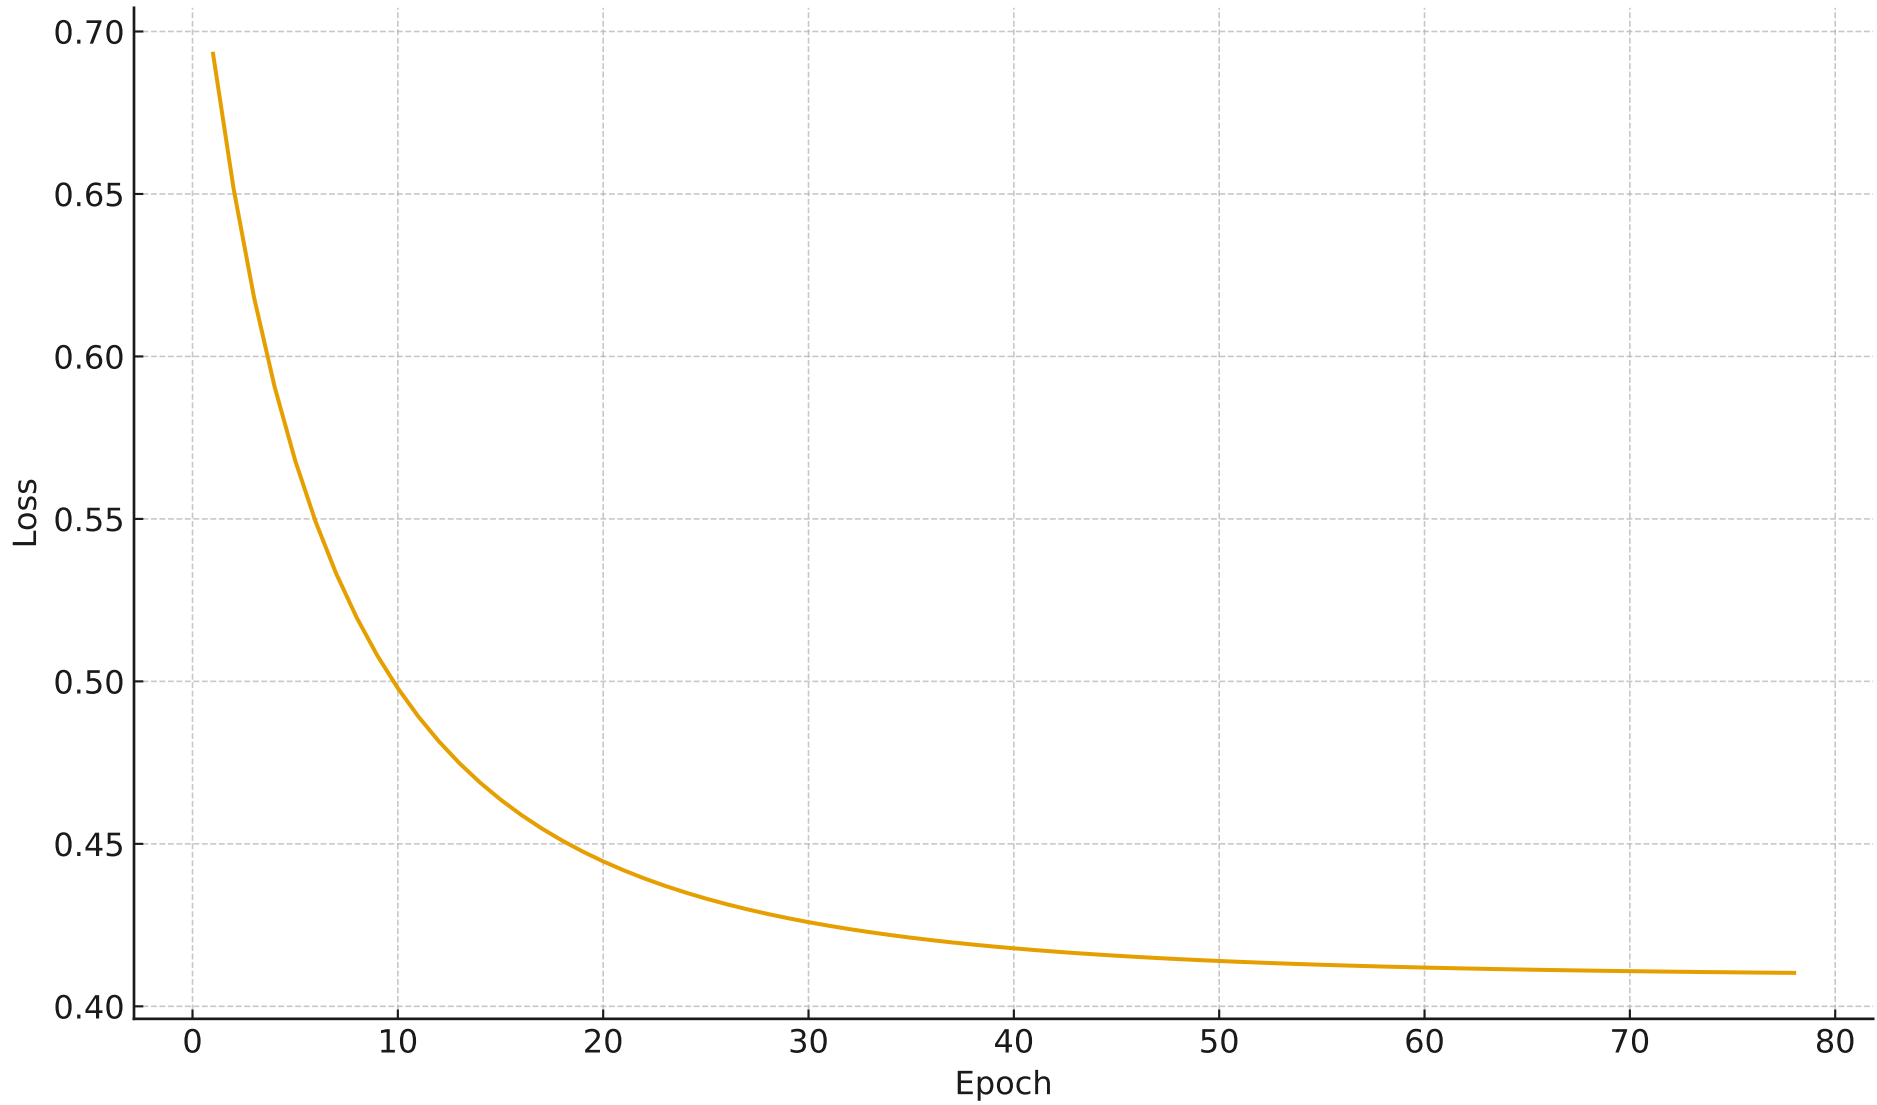

Supplement: supplementary_material [file loss_main.pdf › A4S25_anonymous_1234/paper/figures/loss_main.pdf]

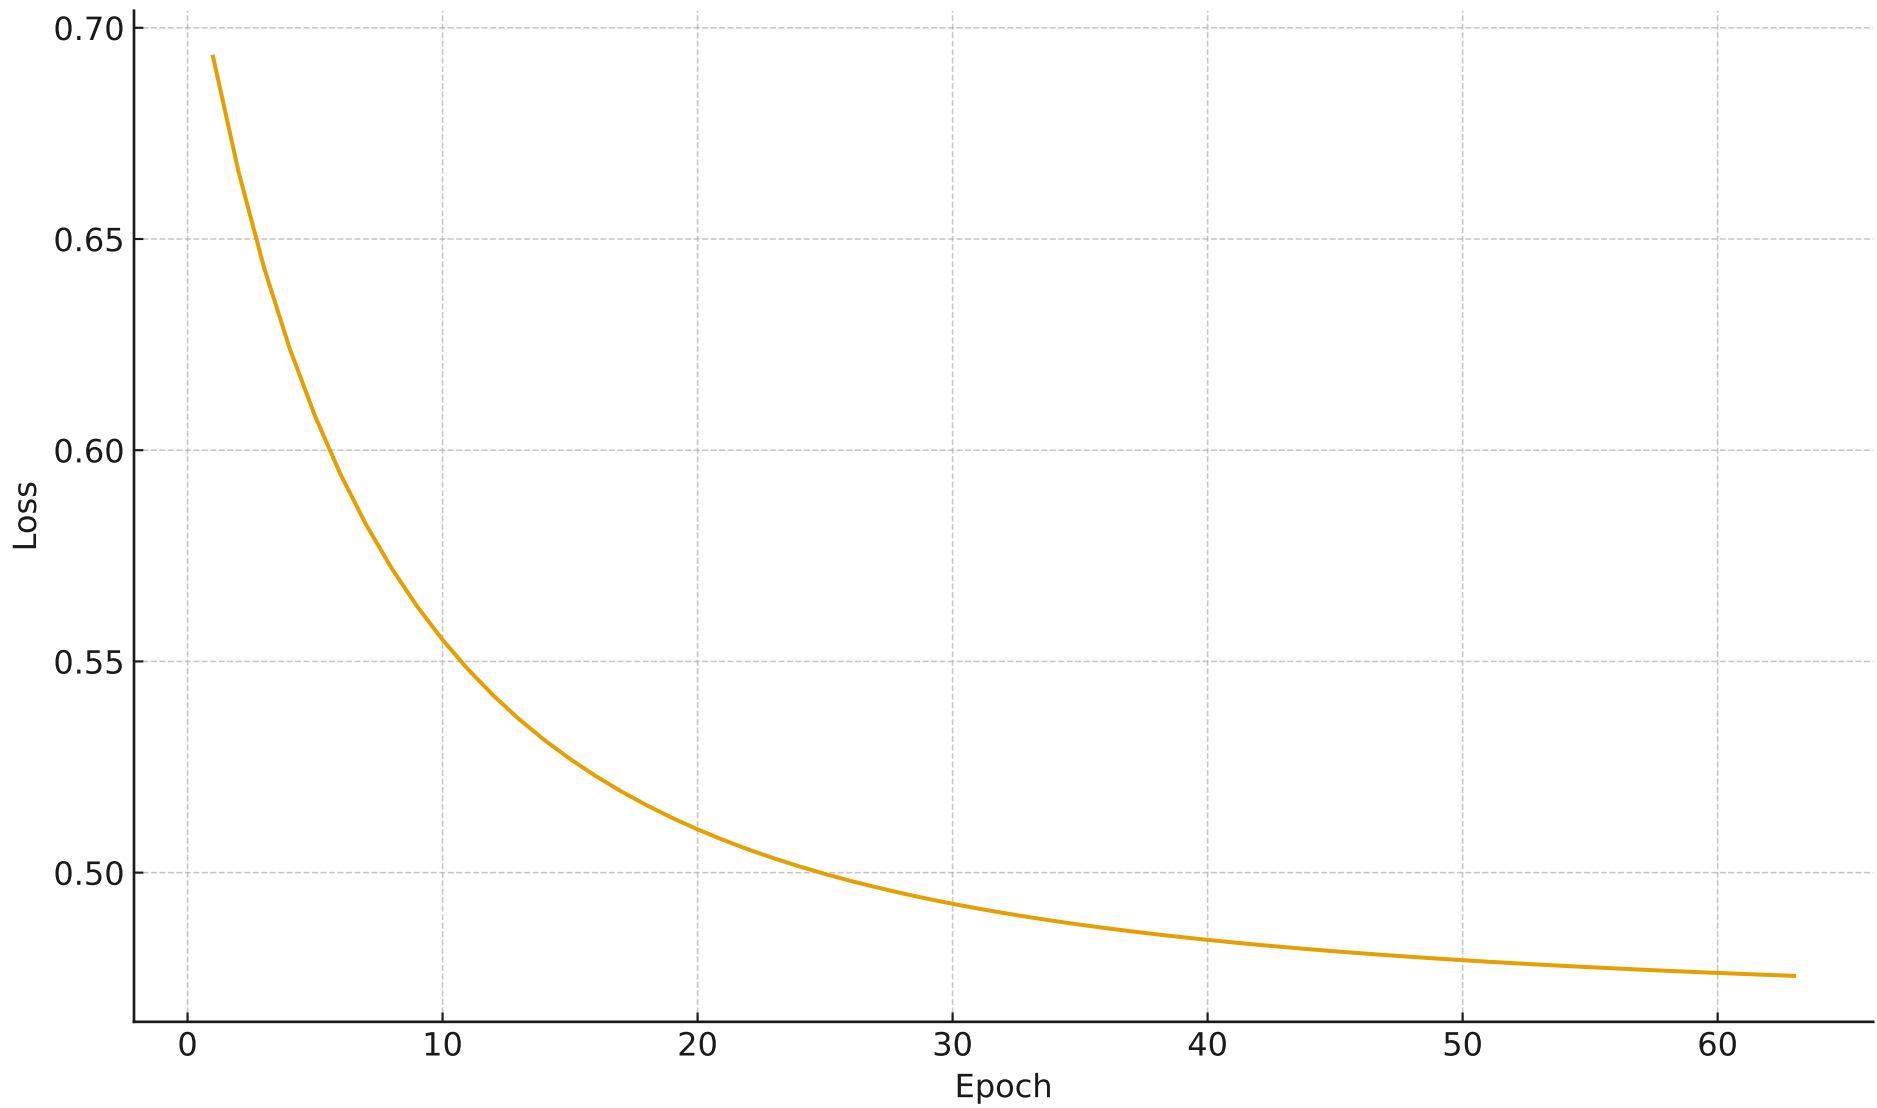

Supplement: supplementary_material [file loss_robS3_N0.0.pdf › A4S25_anonymous_1234/paper/figures/loss_robS3_N0.0.pdf]

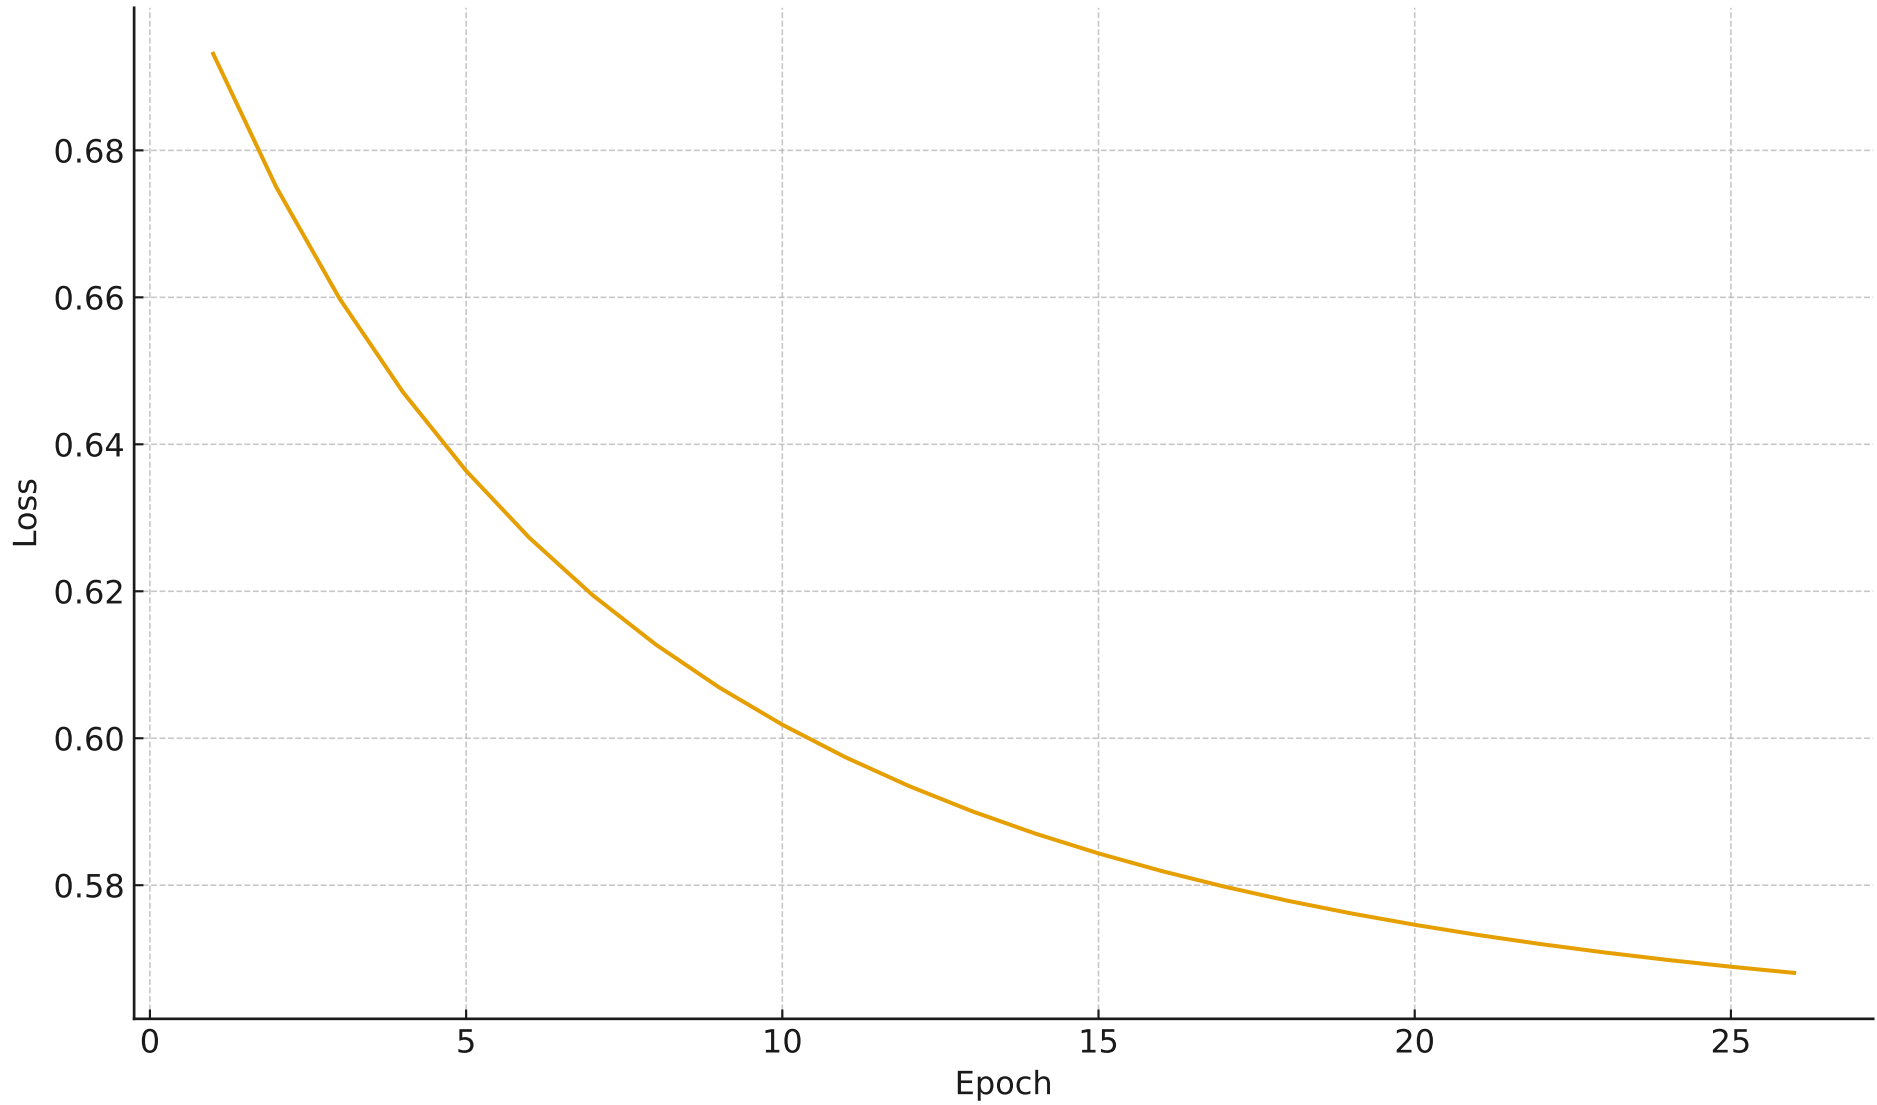

Supplement: supplementary_material [file loss_robS3_N0.1.pdf › A4S25_anonymous_1234/paper/figures/loss_robS3_N0.1.pdf]

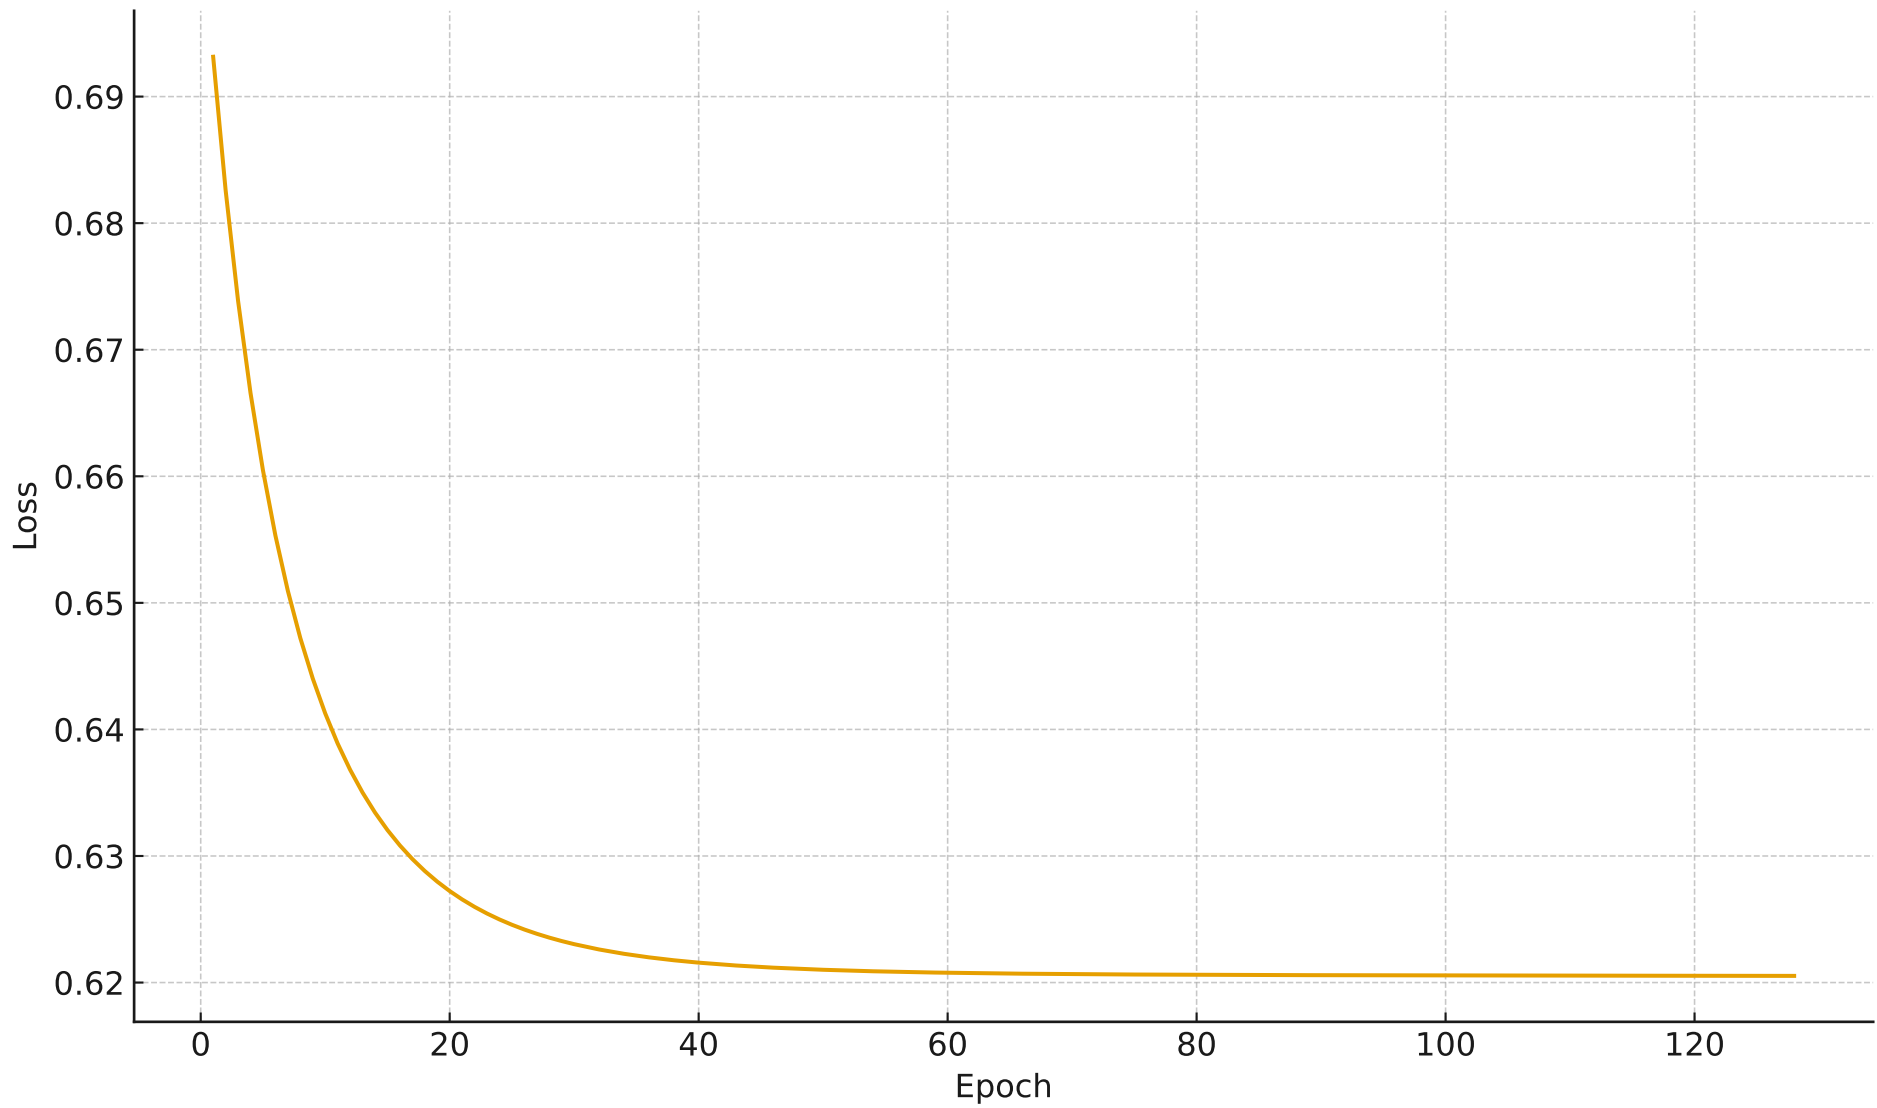

Supplement: supplementary_material [file loss_robS3_N0.2.pdf › A4S25_anonymous_1234/paper/figures/loss_robS3_N0.2.pdf]

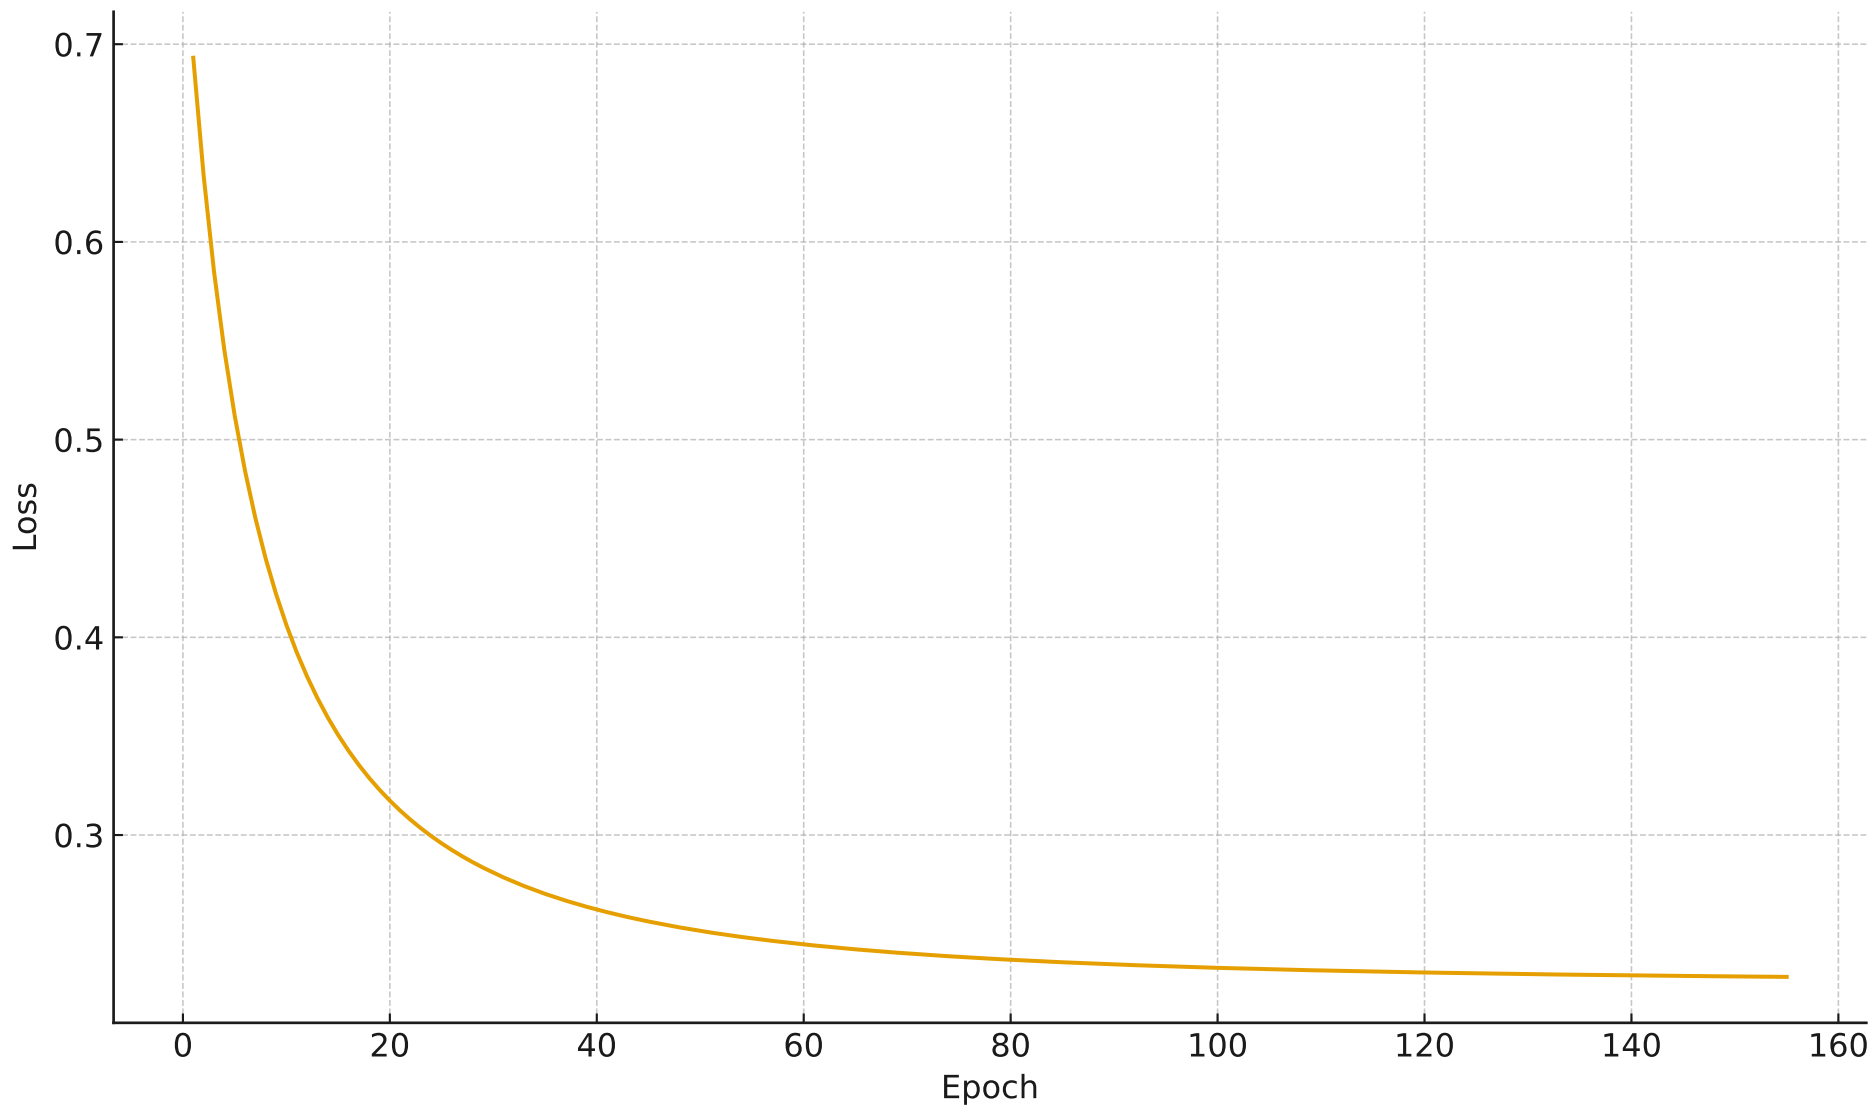

Supplement: supplementary_material [file loss_robS5_N0.0.pdf › A4S25_anonymous_1234/paper/figures/loss_robS5_N0.0.pdf]

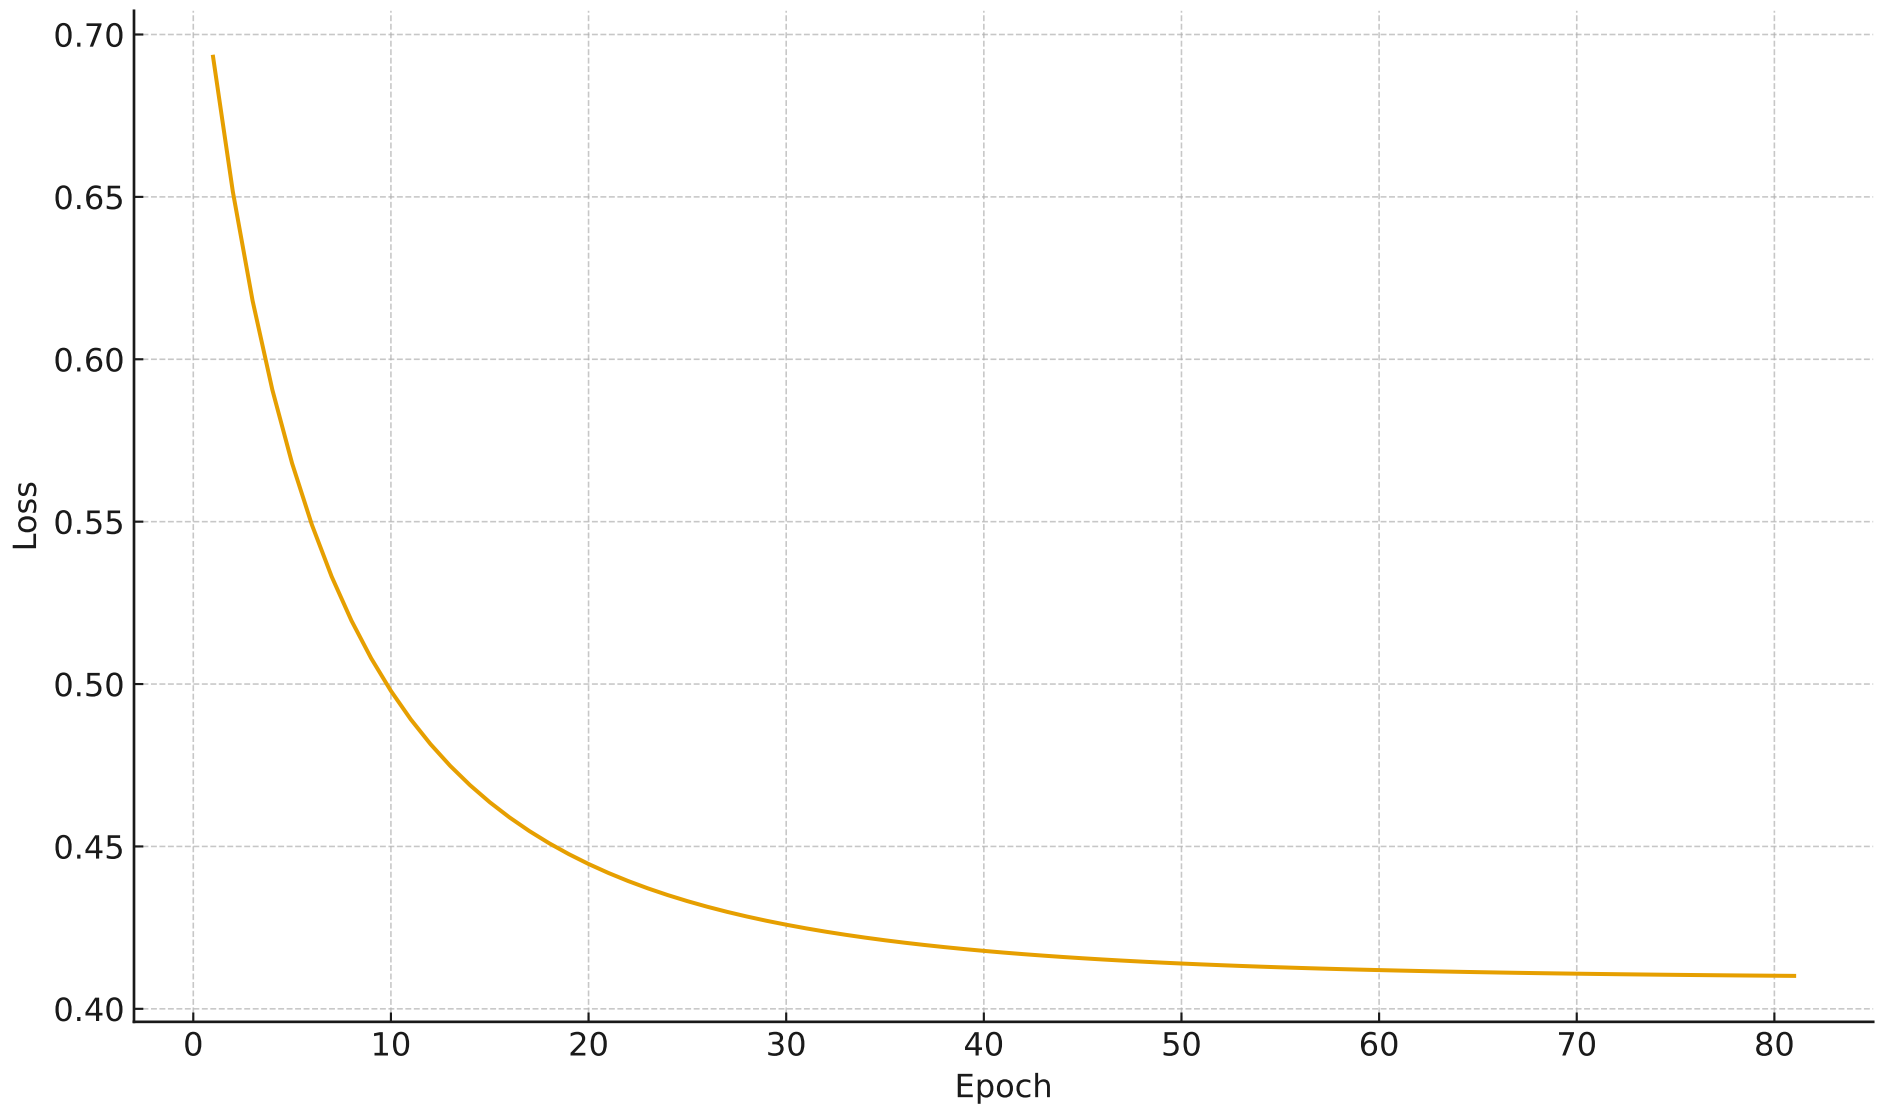

Supplement: supplementary_material [file loss_static.pdf › A4S25_anonymous_1234/paper/figures/loss_static.pdf]

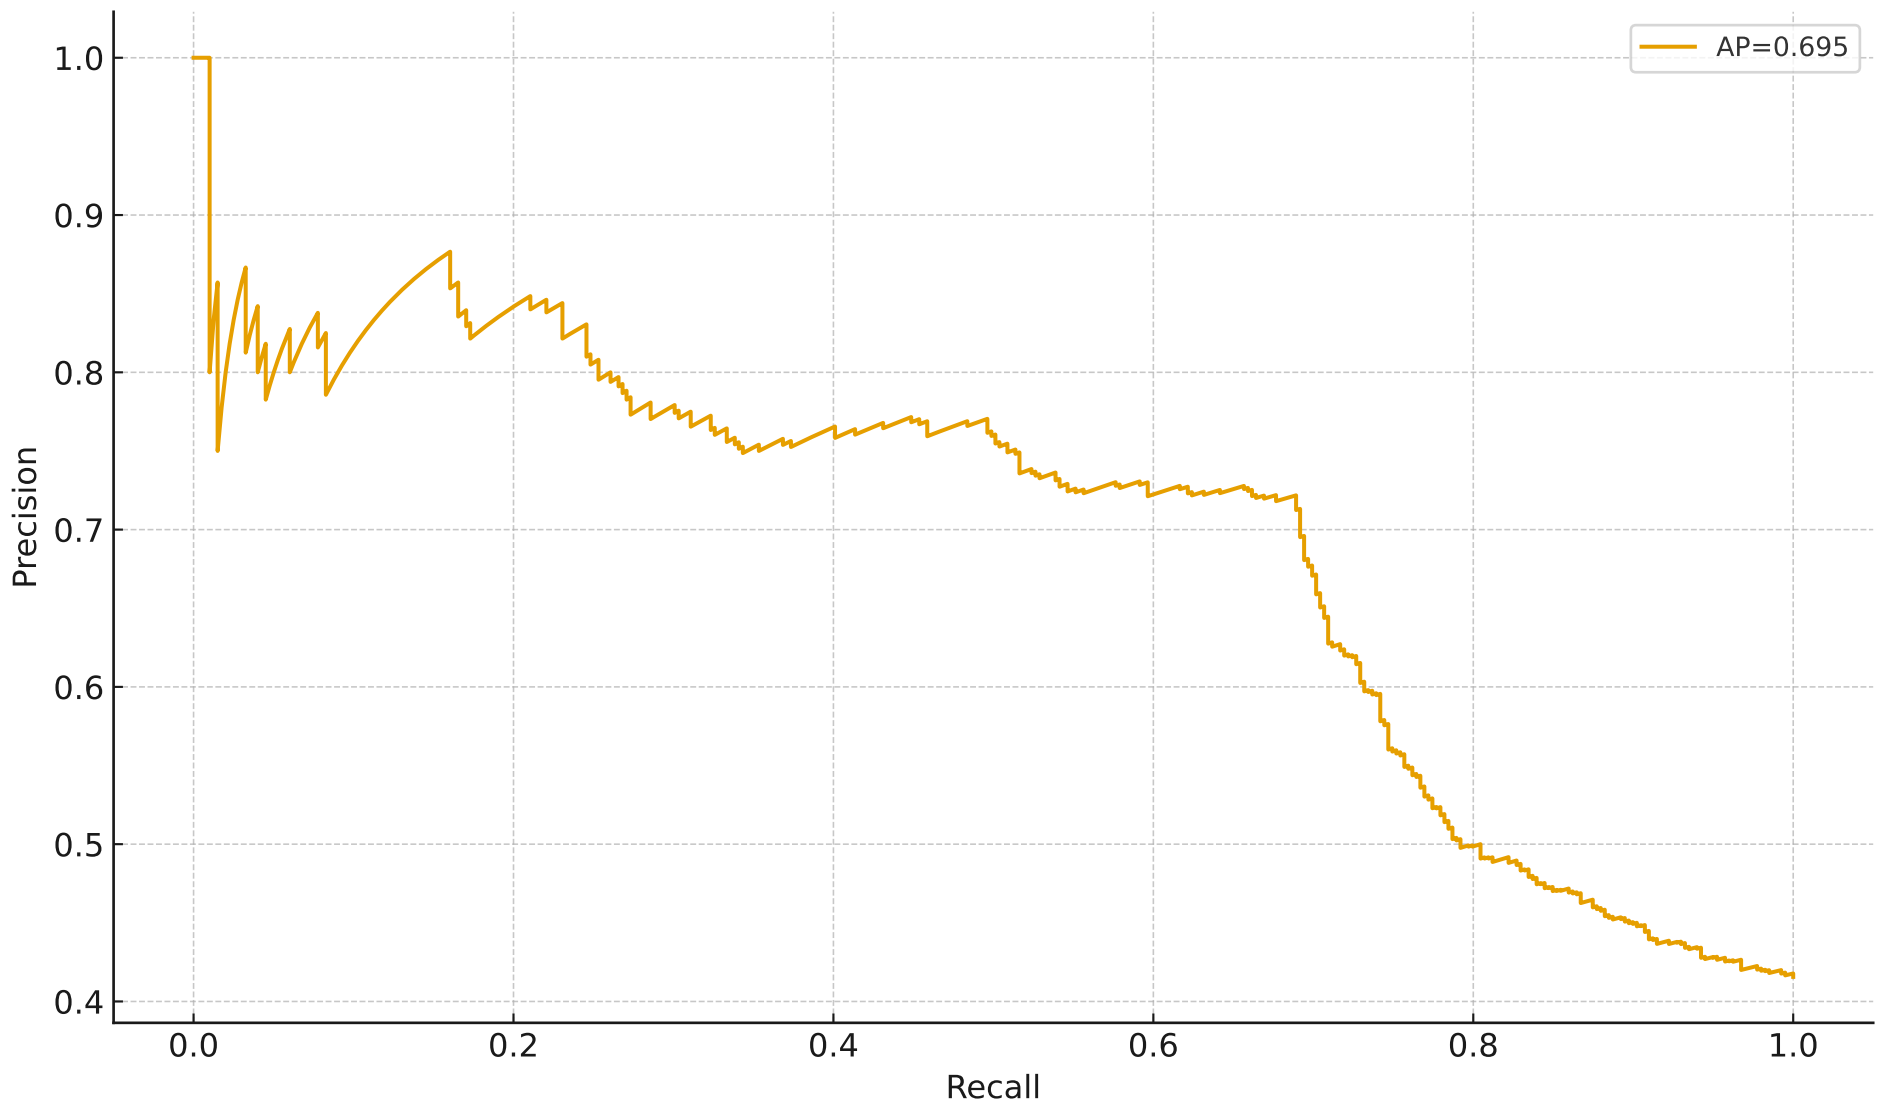

Supplement: supplementary_material [file pr_abl_high_noise.pdf › A4S25_anonymous_1234/paper/figures/pr_abl_high_noise.pdf]

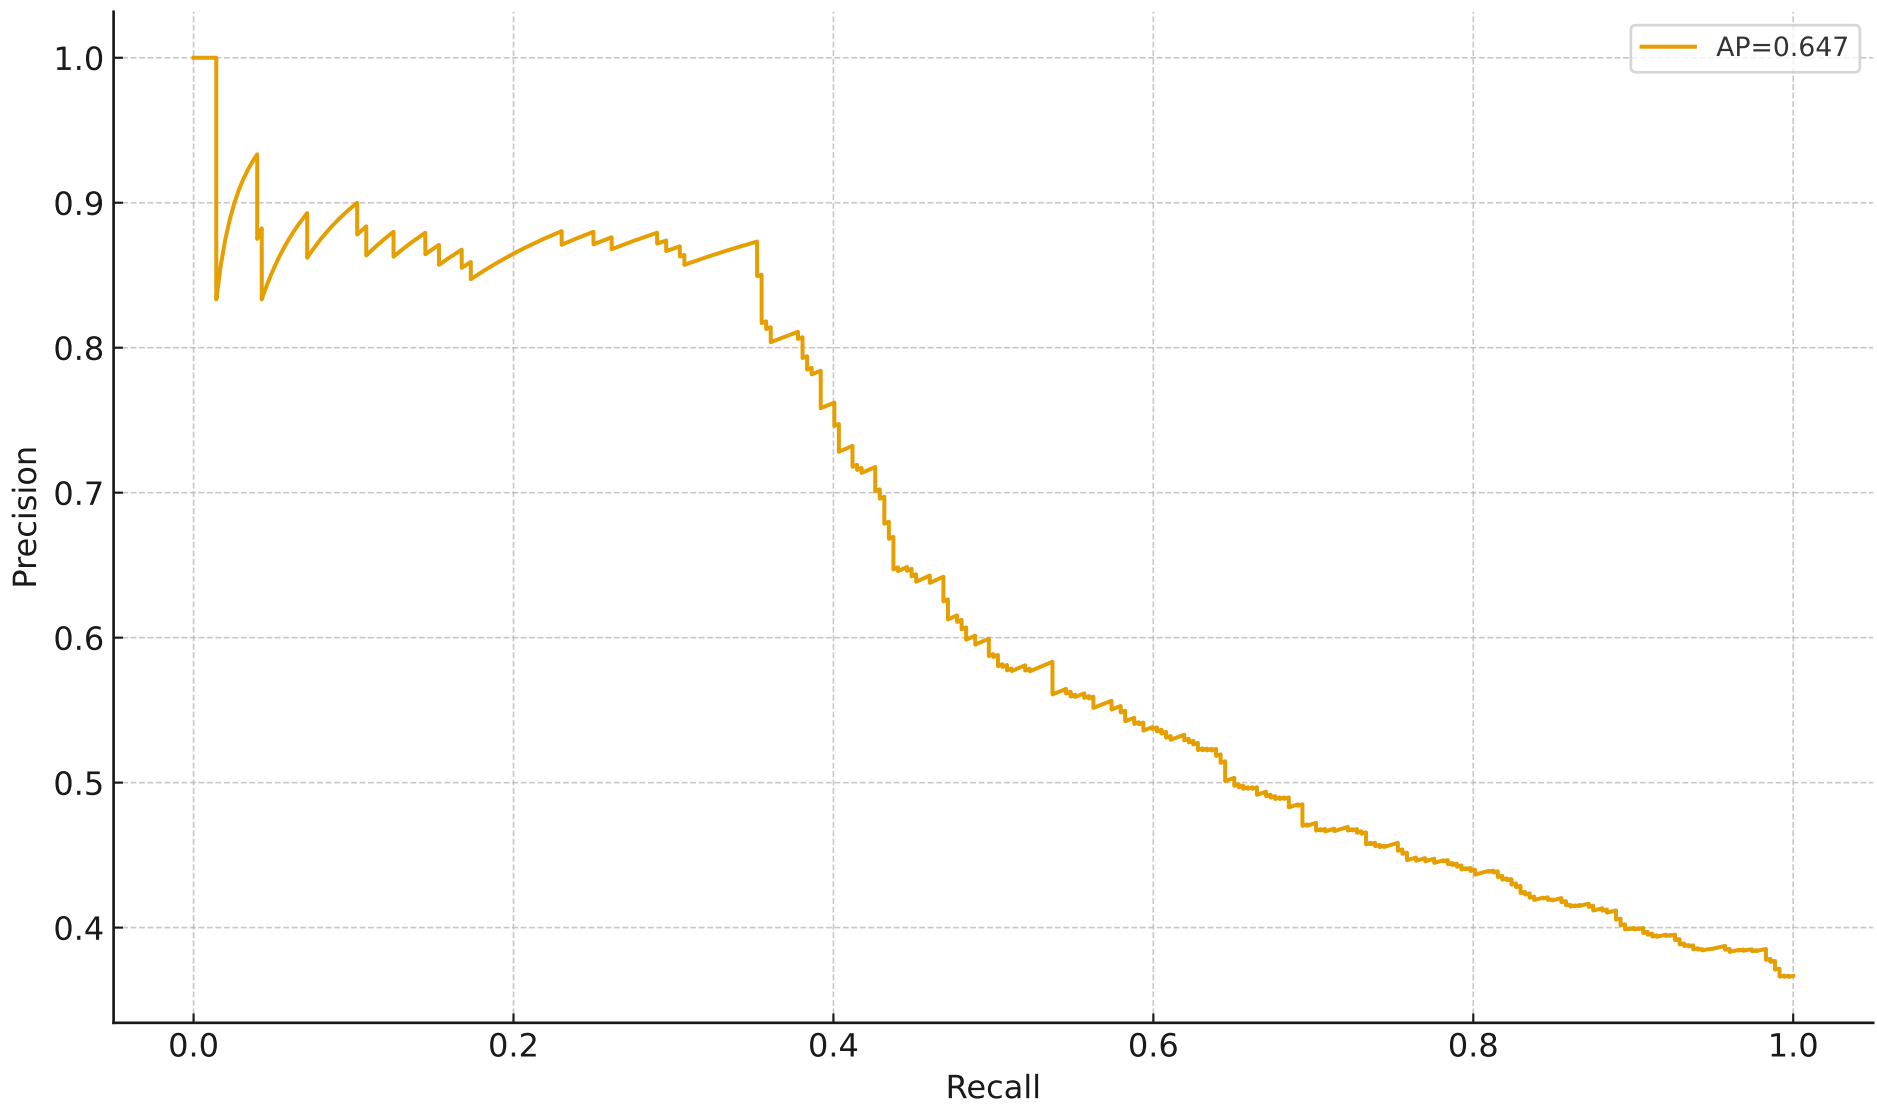

Supplement: supplementary_material [file pr_abl_high_sparsity.pdf › A4S25_anonymous_1234/paper/figures/pr_abl_high_sparsity.pdf]

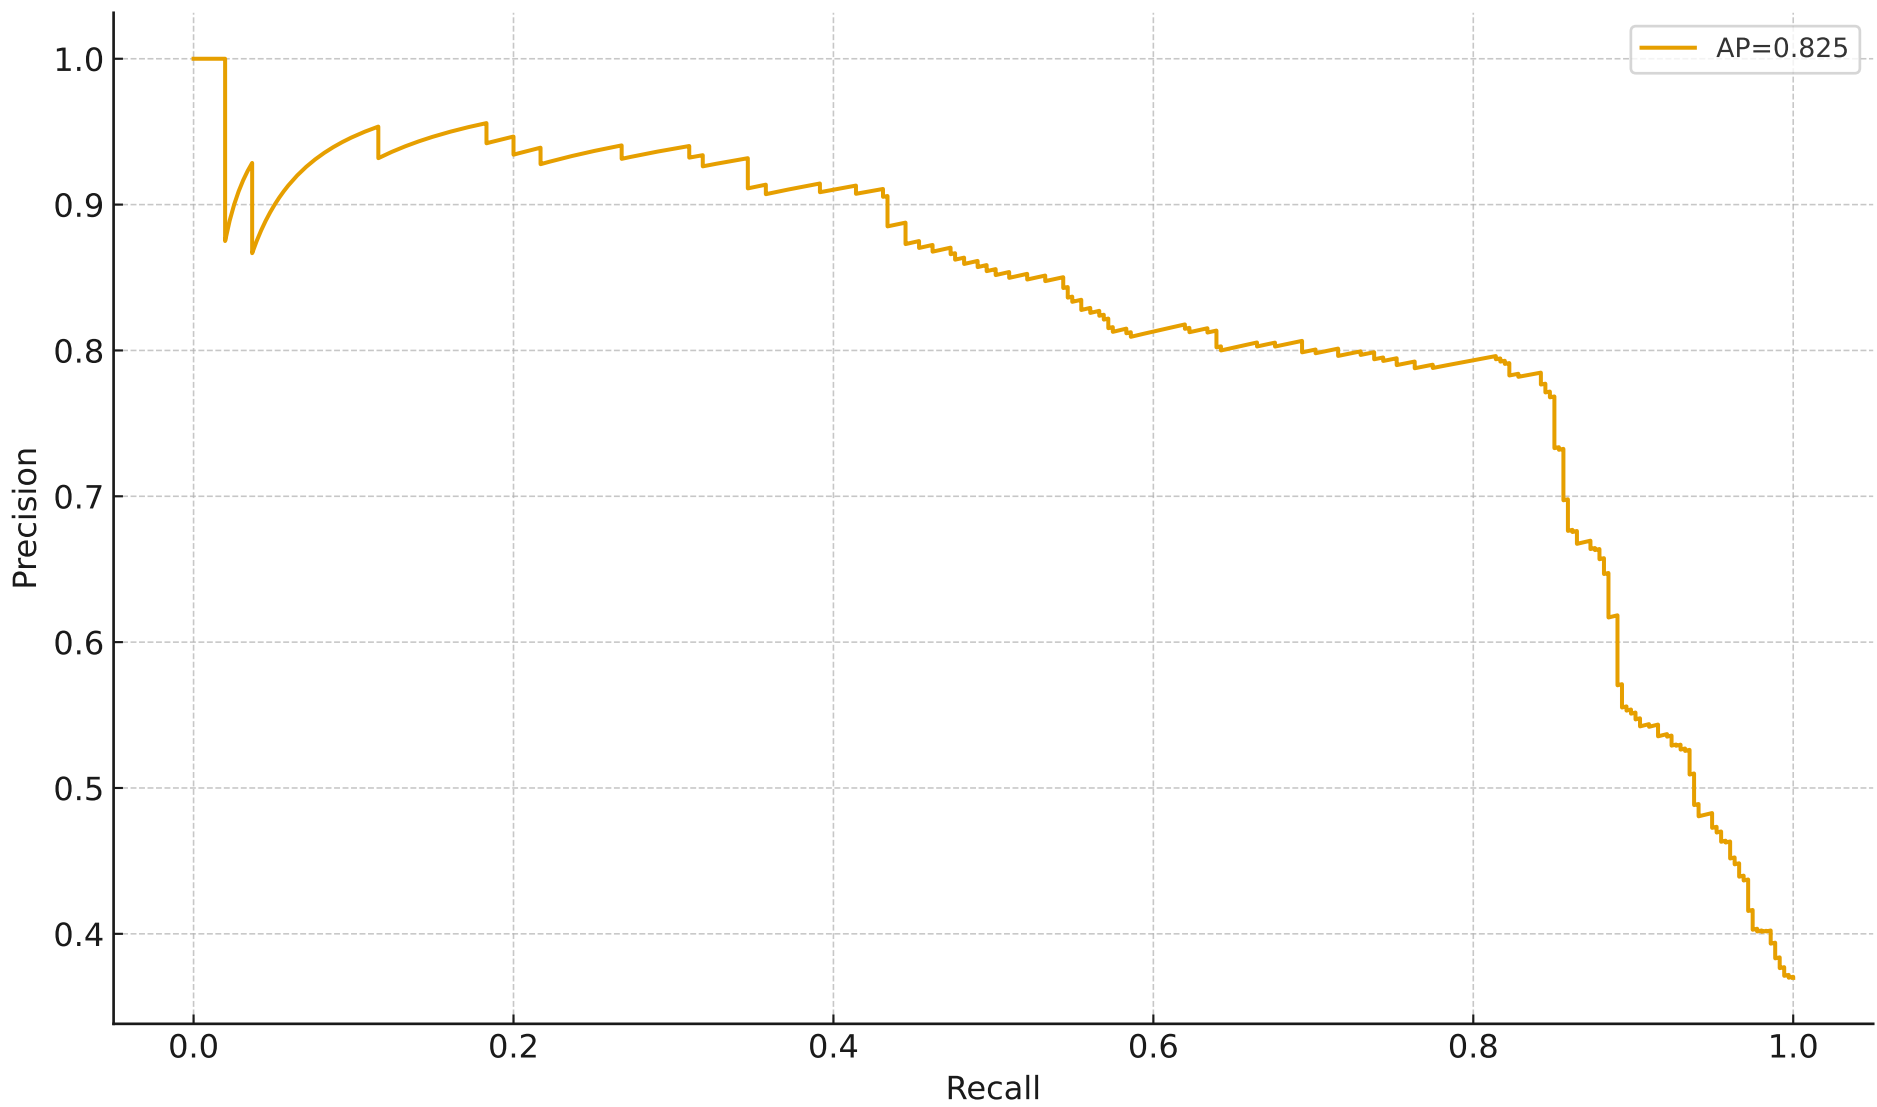

Supplement: supplementary_material [file pr_abl_no_uncertainty.pdf › A4S25_anonymous_1234/paper/figures/pr_abl_no_uncertainty.pdf]

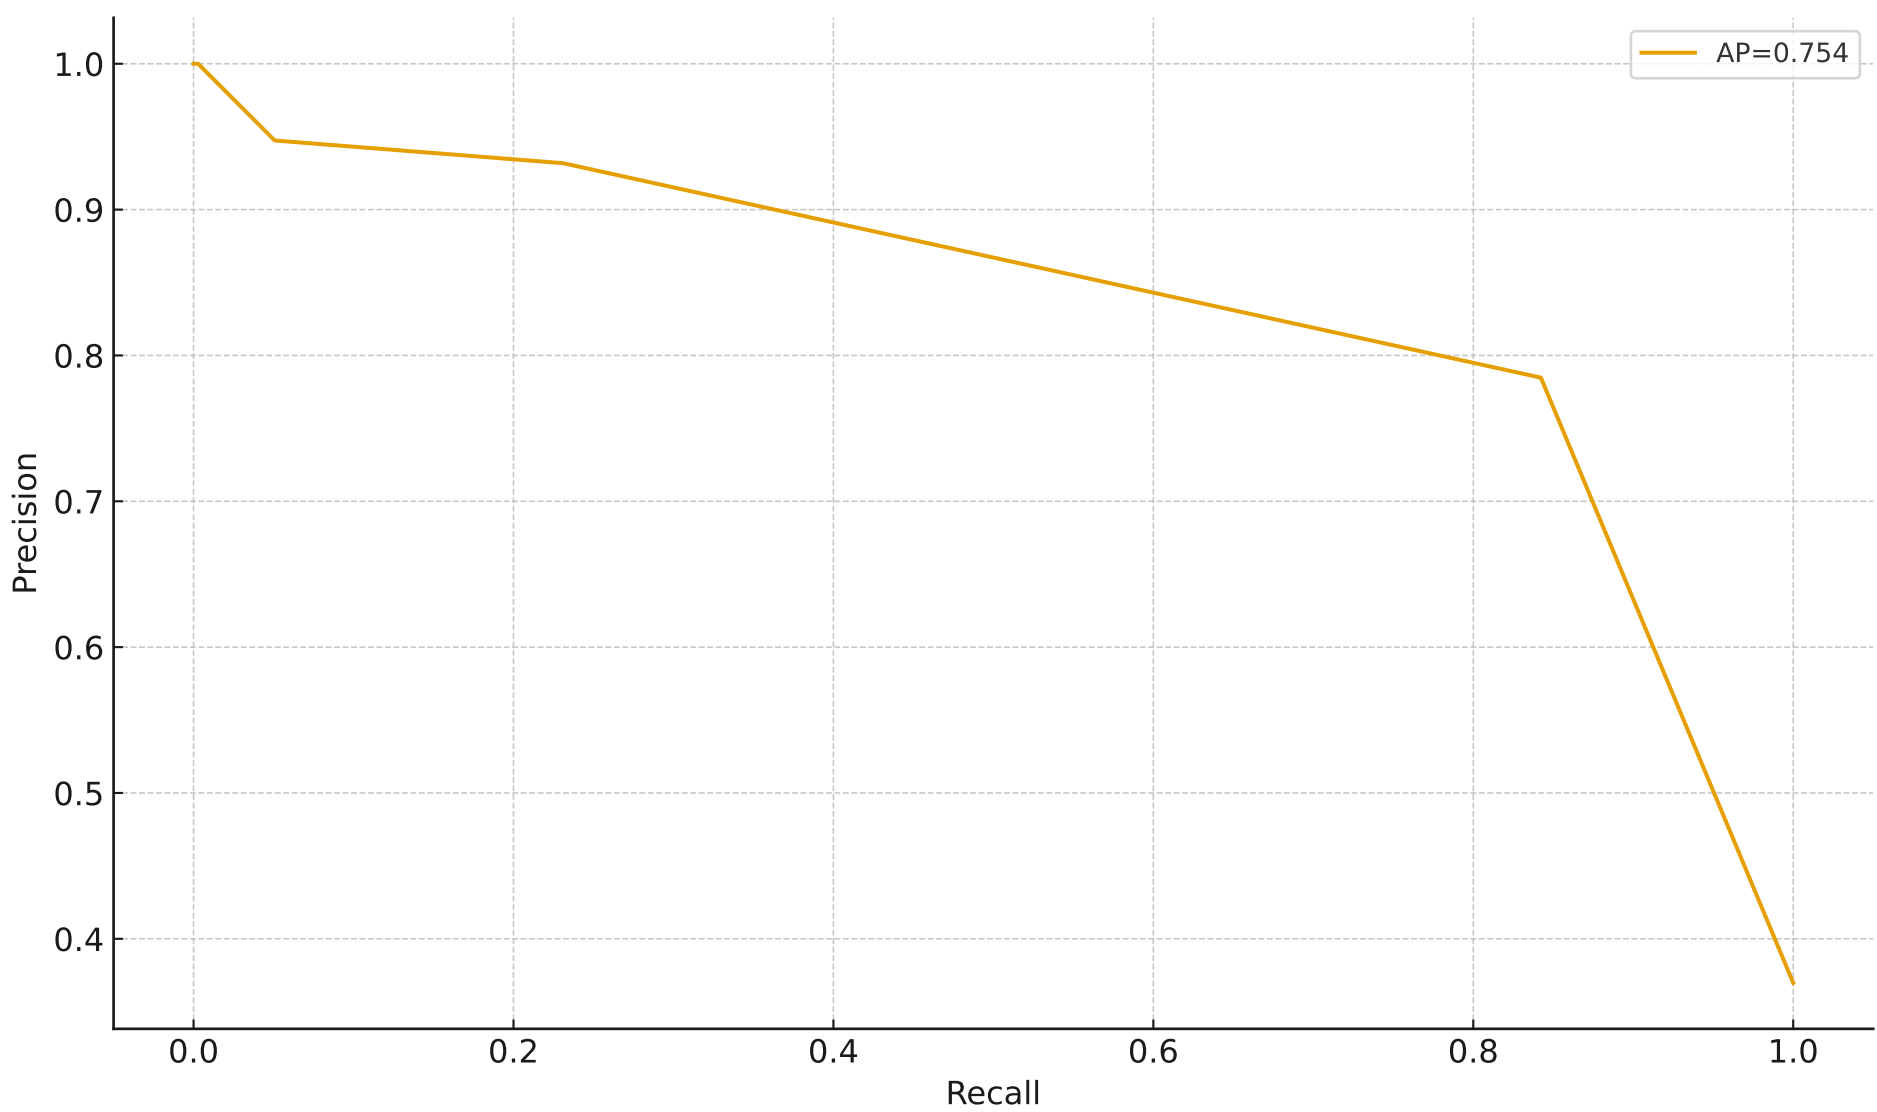

Supplement: supplementary_material [file pr_baseline_heuristic.pdf › A4S25_anonymous_1234/paper/figures/pr_baseline_heuristic.pdf]

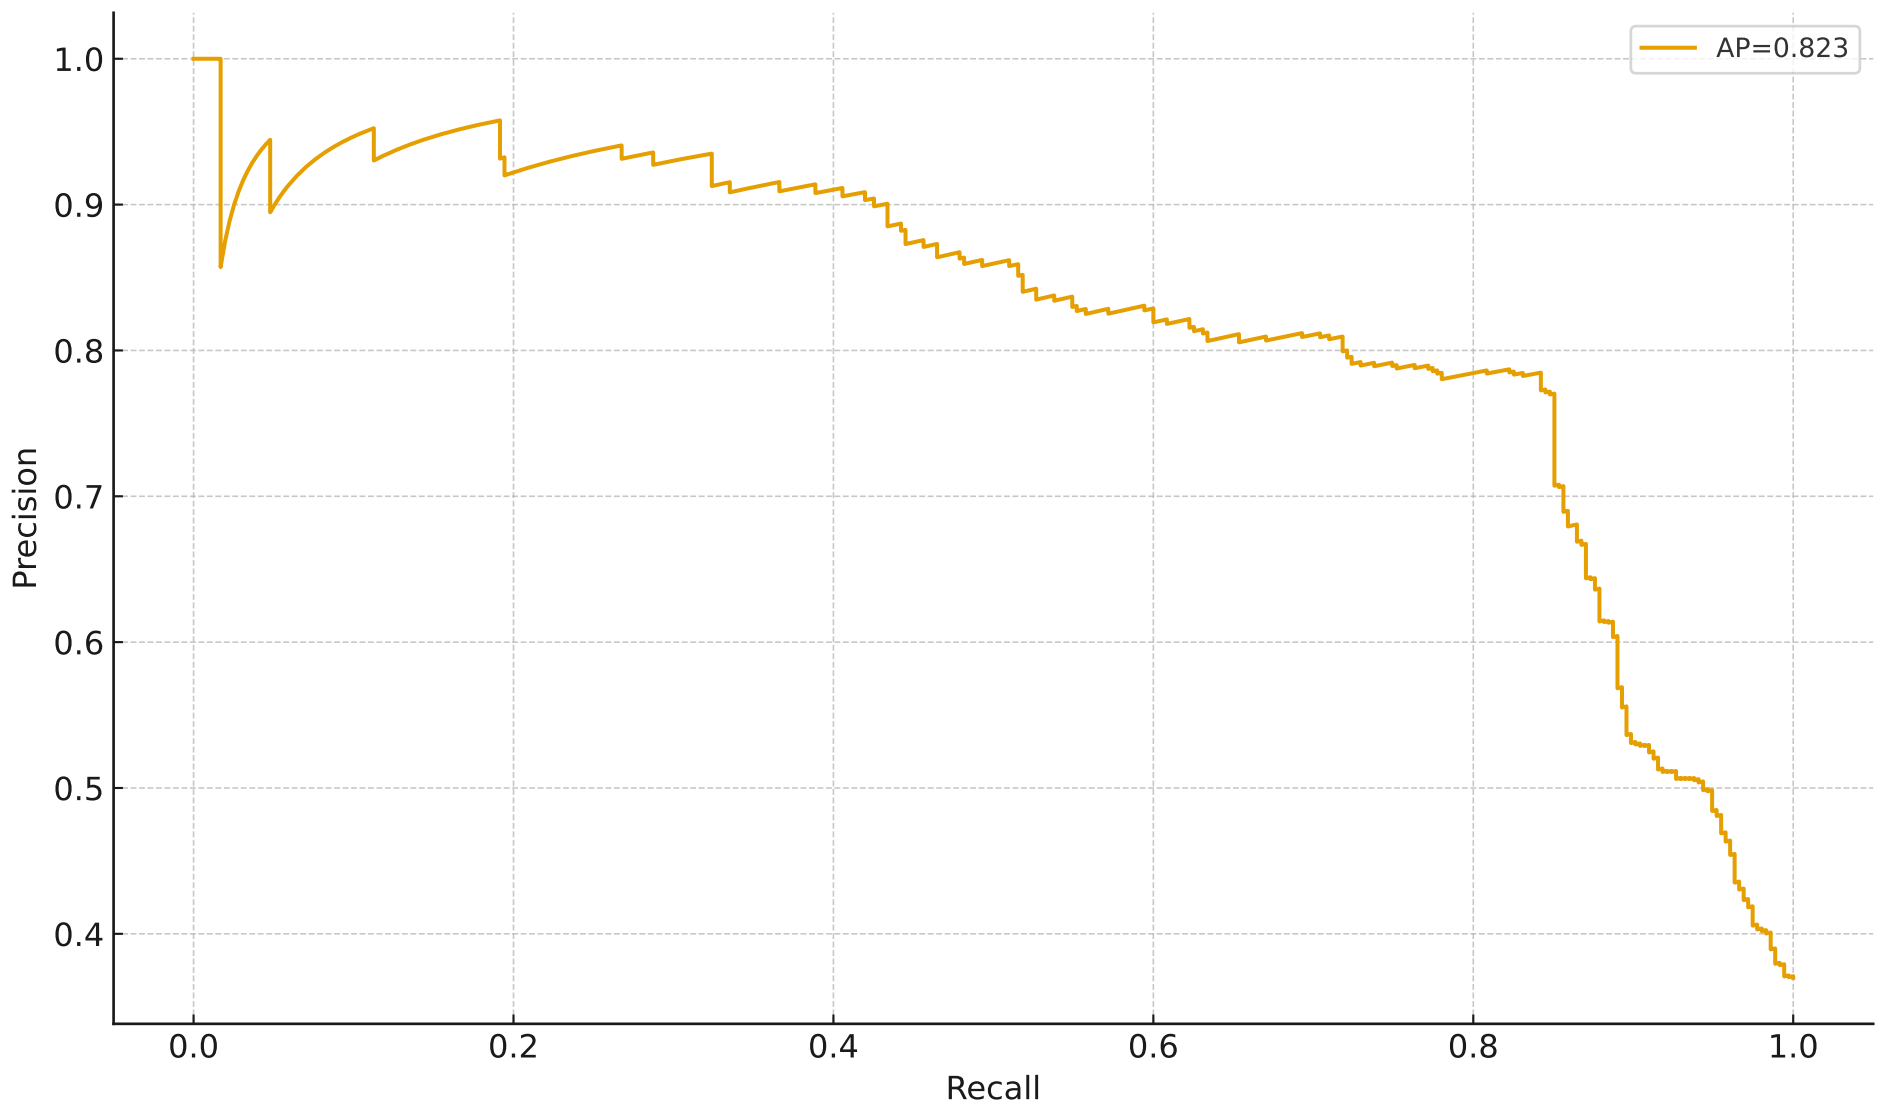

Supplement: supplementary_material [file pr_main.pdf › A4S25_anonymous_1234/paper/figures/pr_main.pdf]

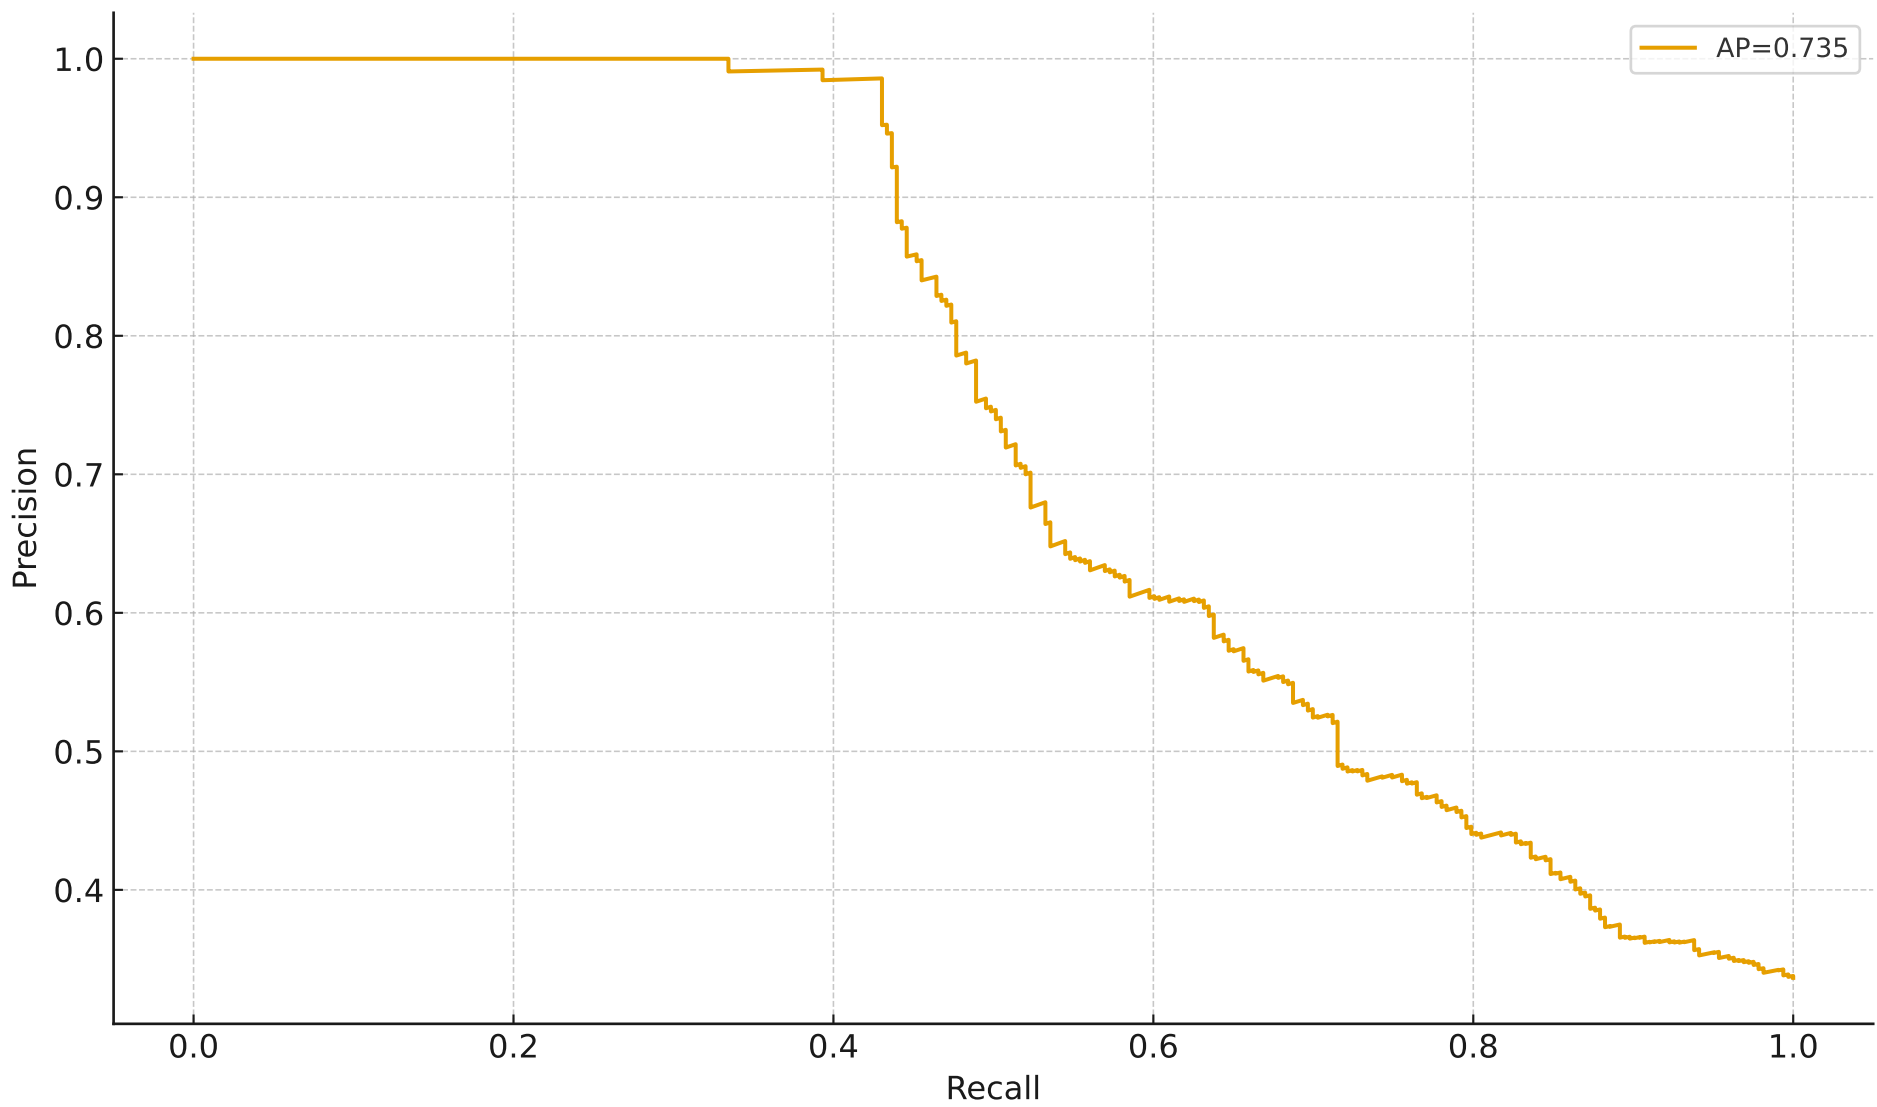

Supplement: supplementary_material [file pr_robS3_N0.0.pdf › A4S25_anonymous_1234/paper/figures/pr_robS3_N0.0.pdf]

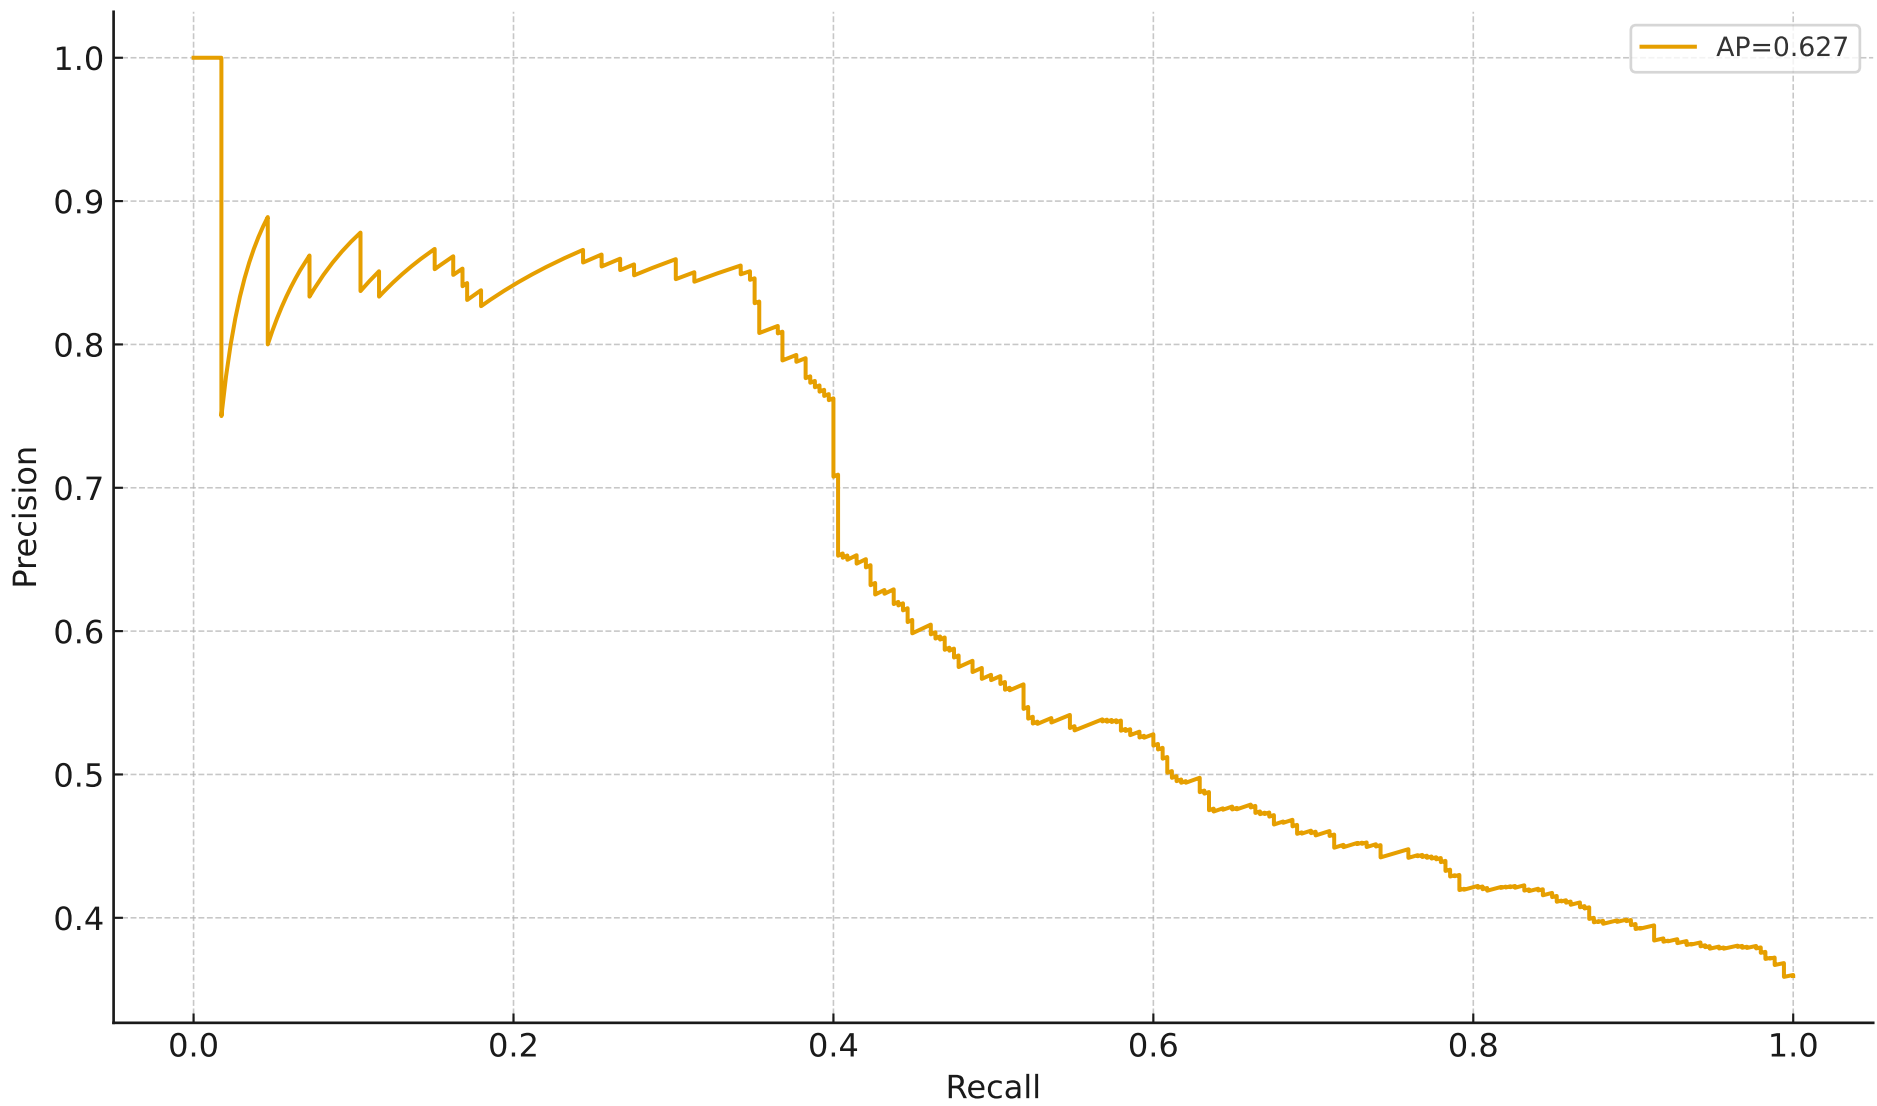

Supplement: supplementary_material [file pr_robS3_N0.1.pdf › A4S25_anonymous_1234/paper/figures/pr_robS3_N0.1.pdf]

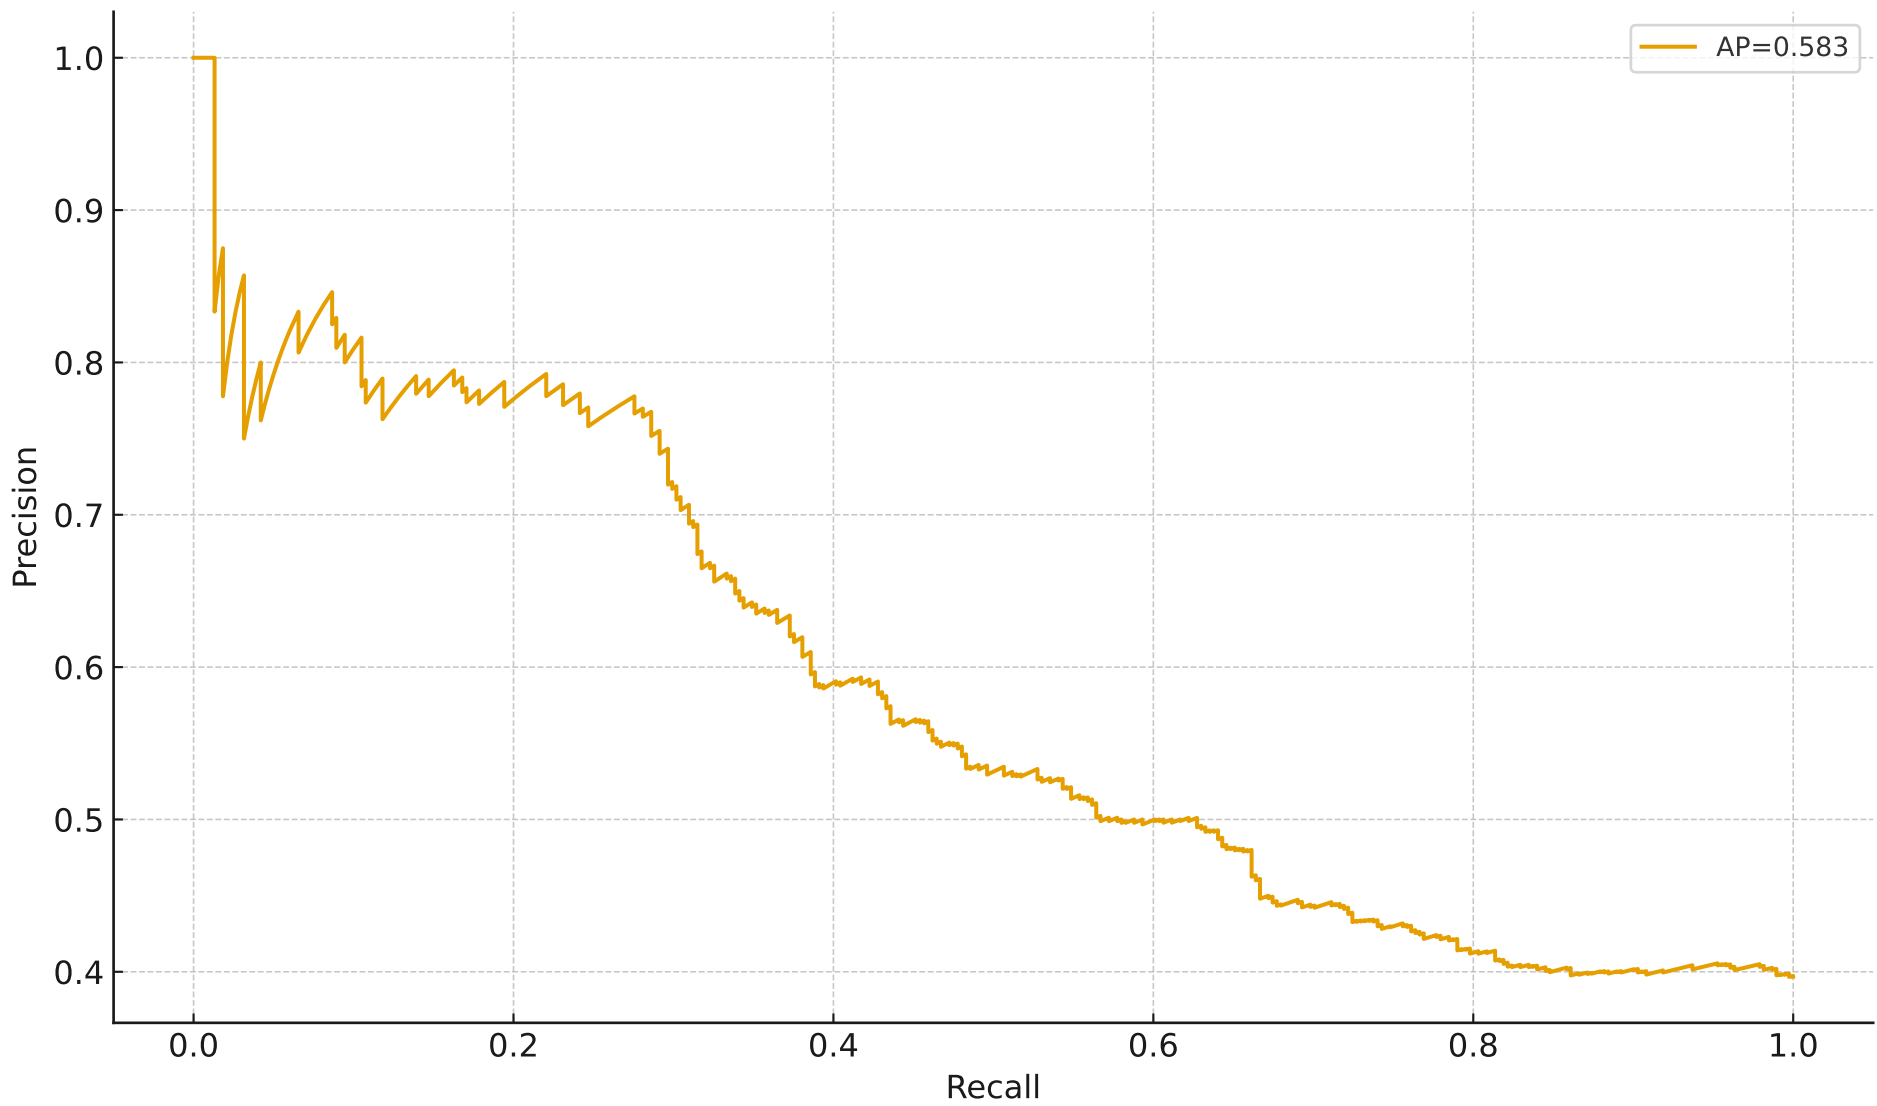

Supplement: supplementary_material [file pr_robS3_N0.2.pdf › A4S25_anonymous_1234/paper/figures/pr_robS3_N0.2.pdf]

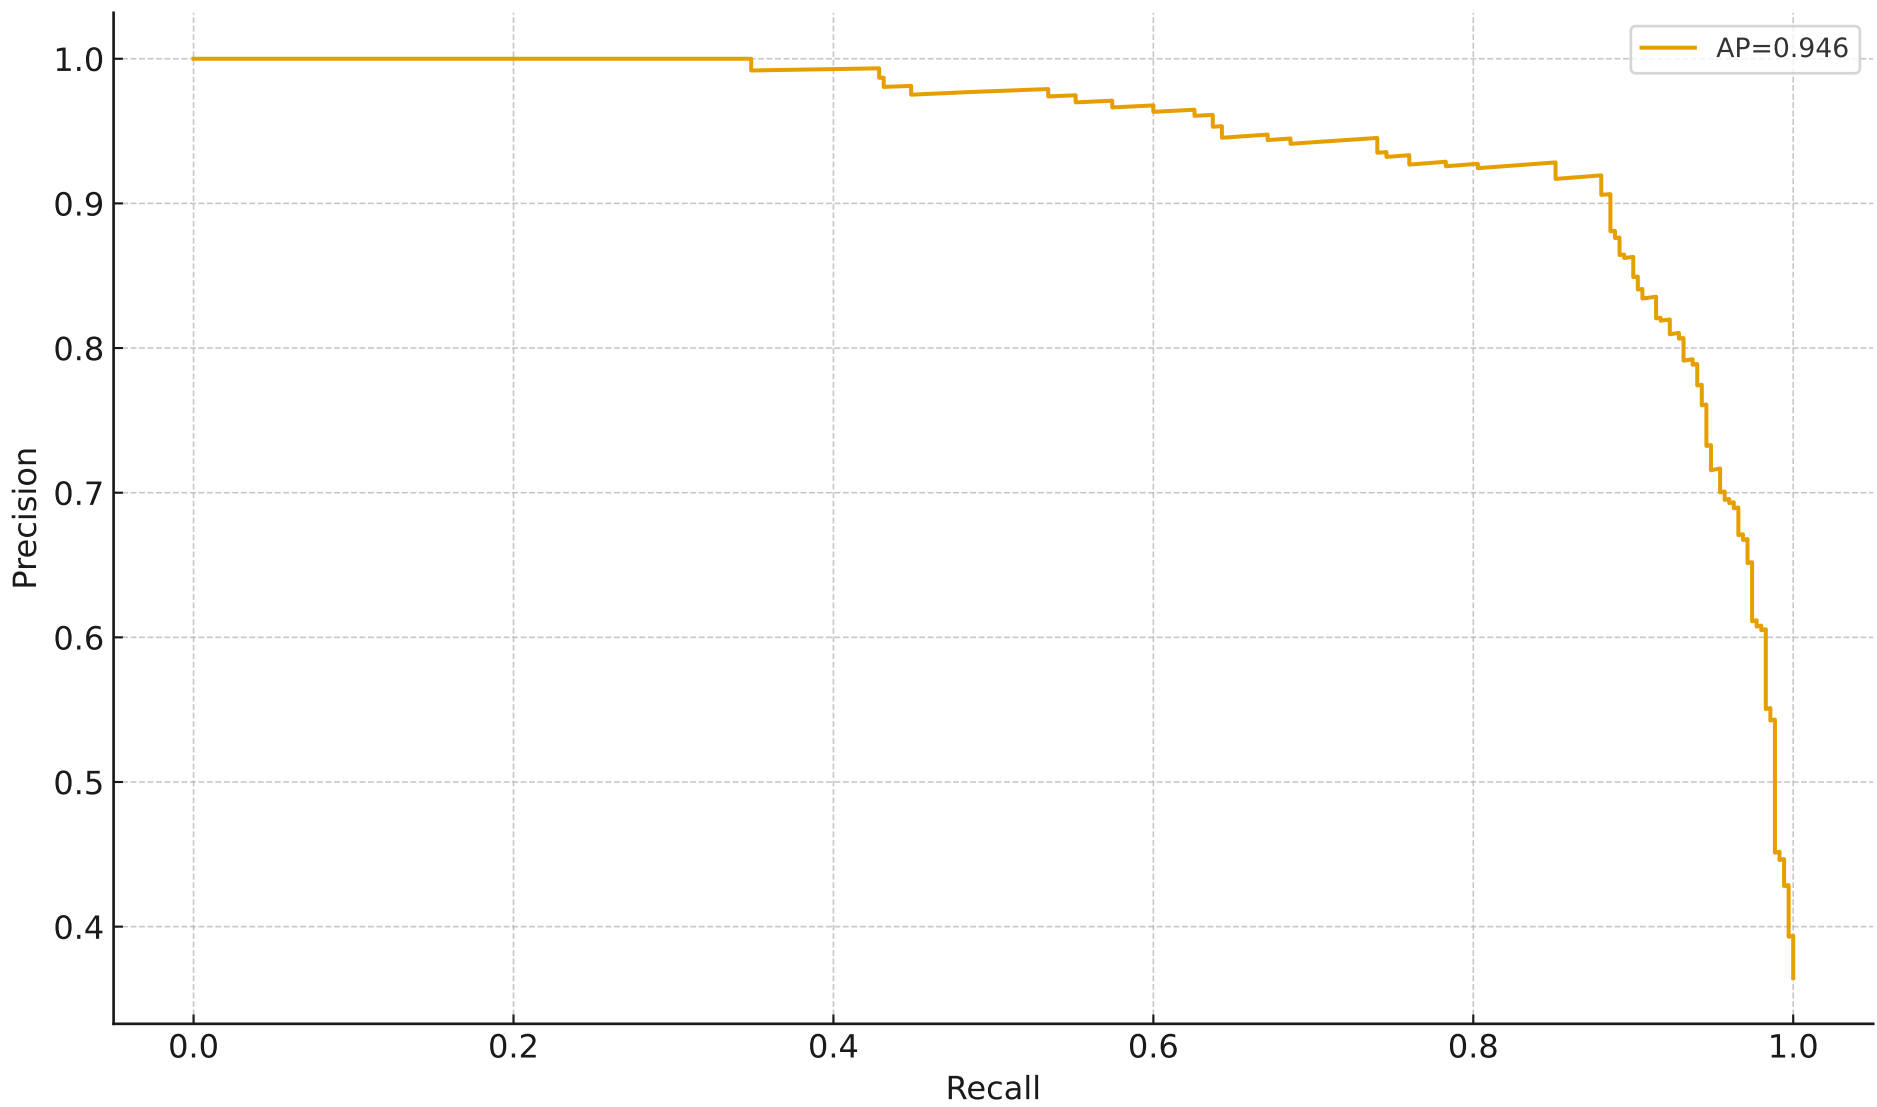

Supplement: supplementary_material [file pr_robS5_N0.0.pdf › A4S25_anonymous_1234/paper/figures/pr_robS5_N0.0.pdf]

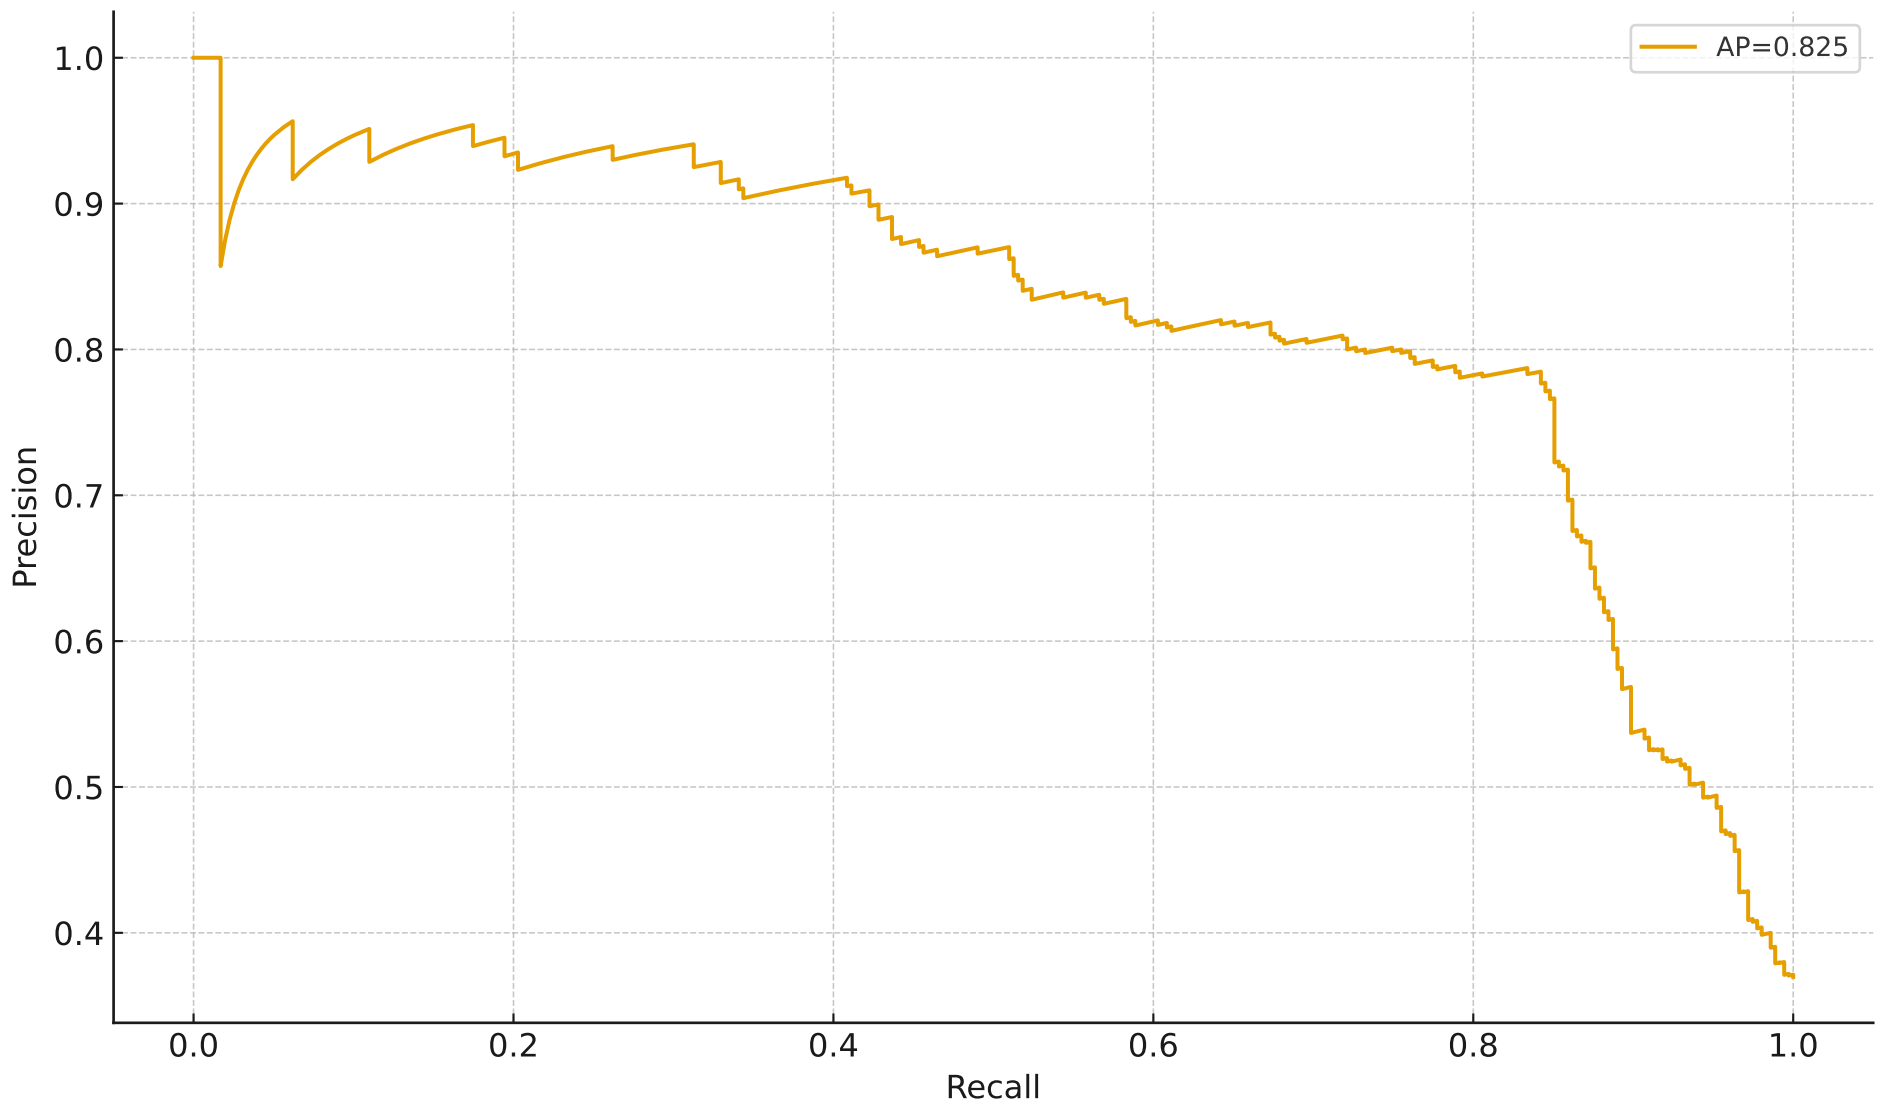

Supplement: supplementary_material [file pr_static.pdf › A4S25_anonymous_1234/paper/figures/pr_static.pdf]

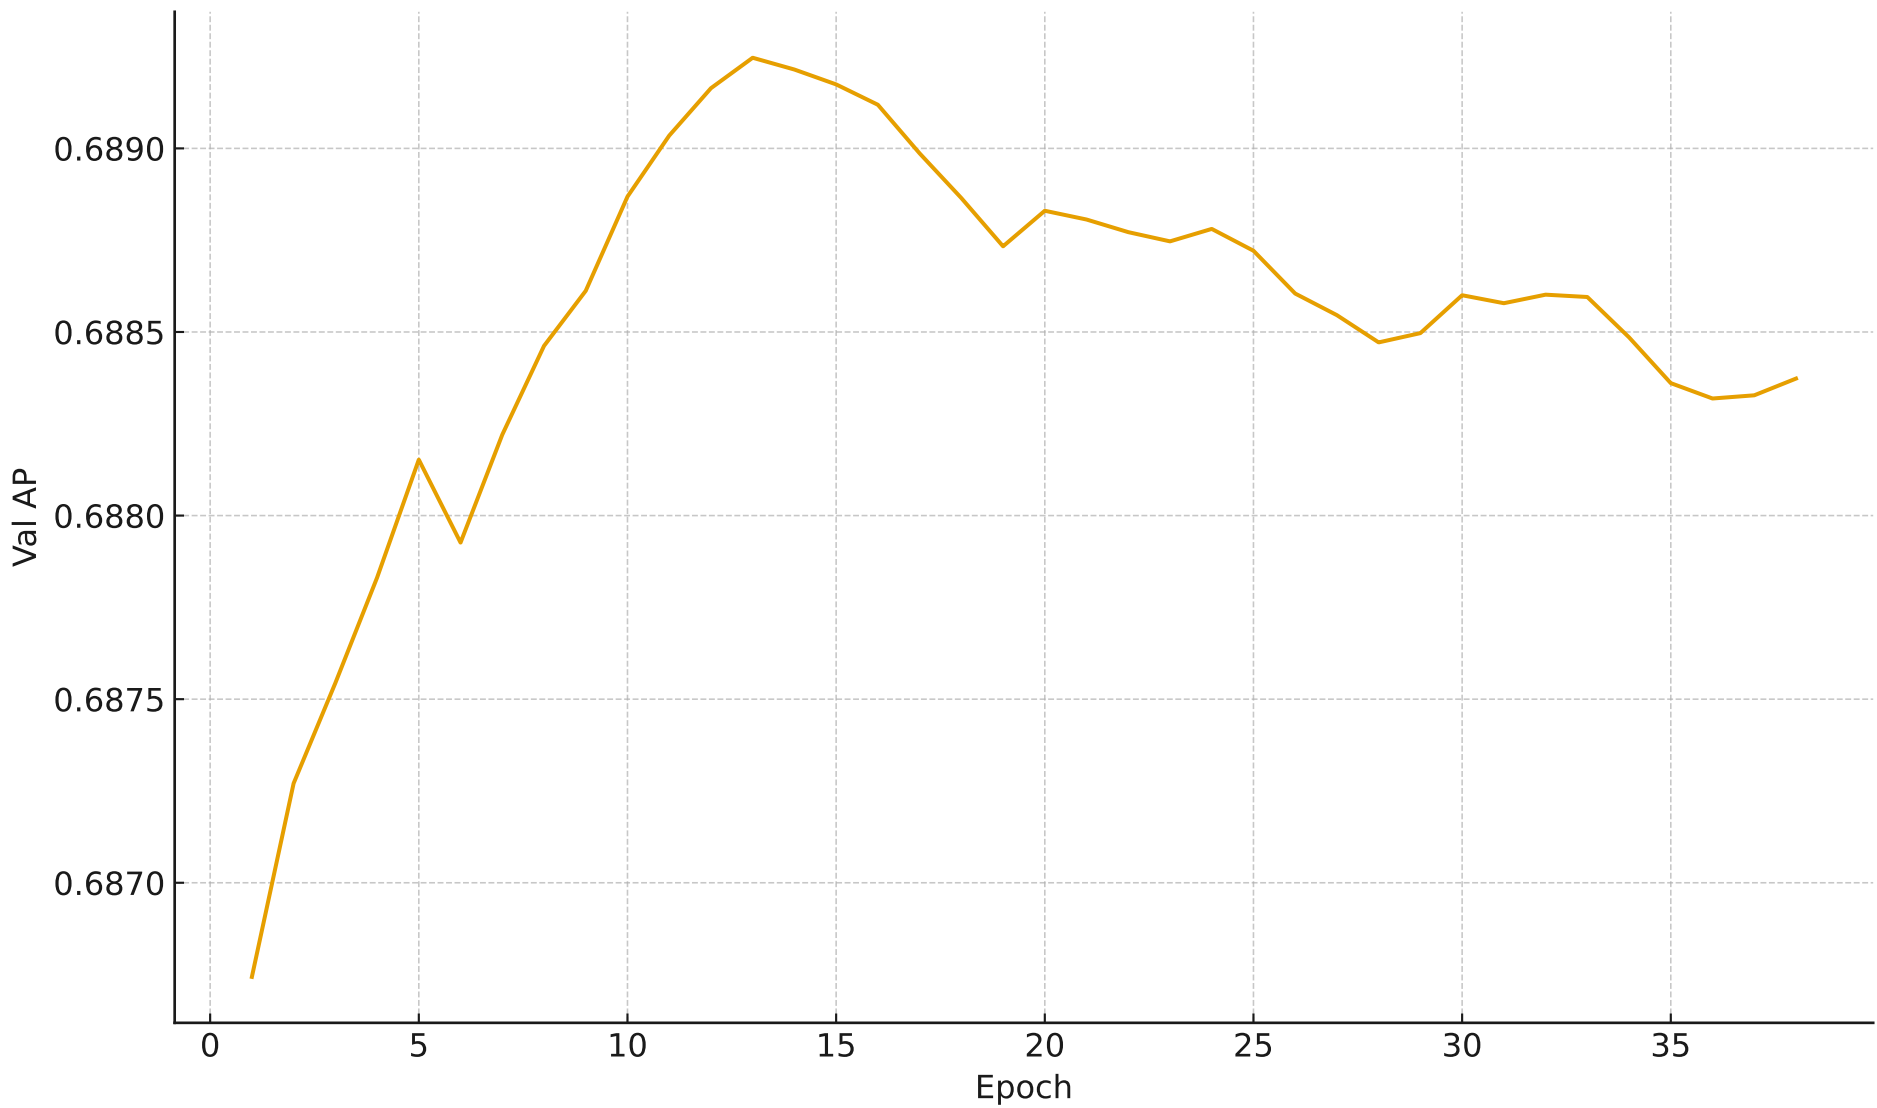

Supplement: supplementary_material [file valap_abl_high_noise.pdf › A4S25_anonymous_1234/paper/figures/valap_abl_high_noise.pdf]

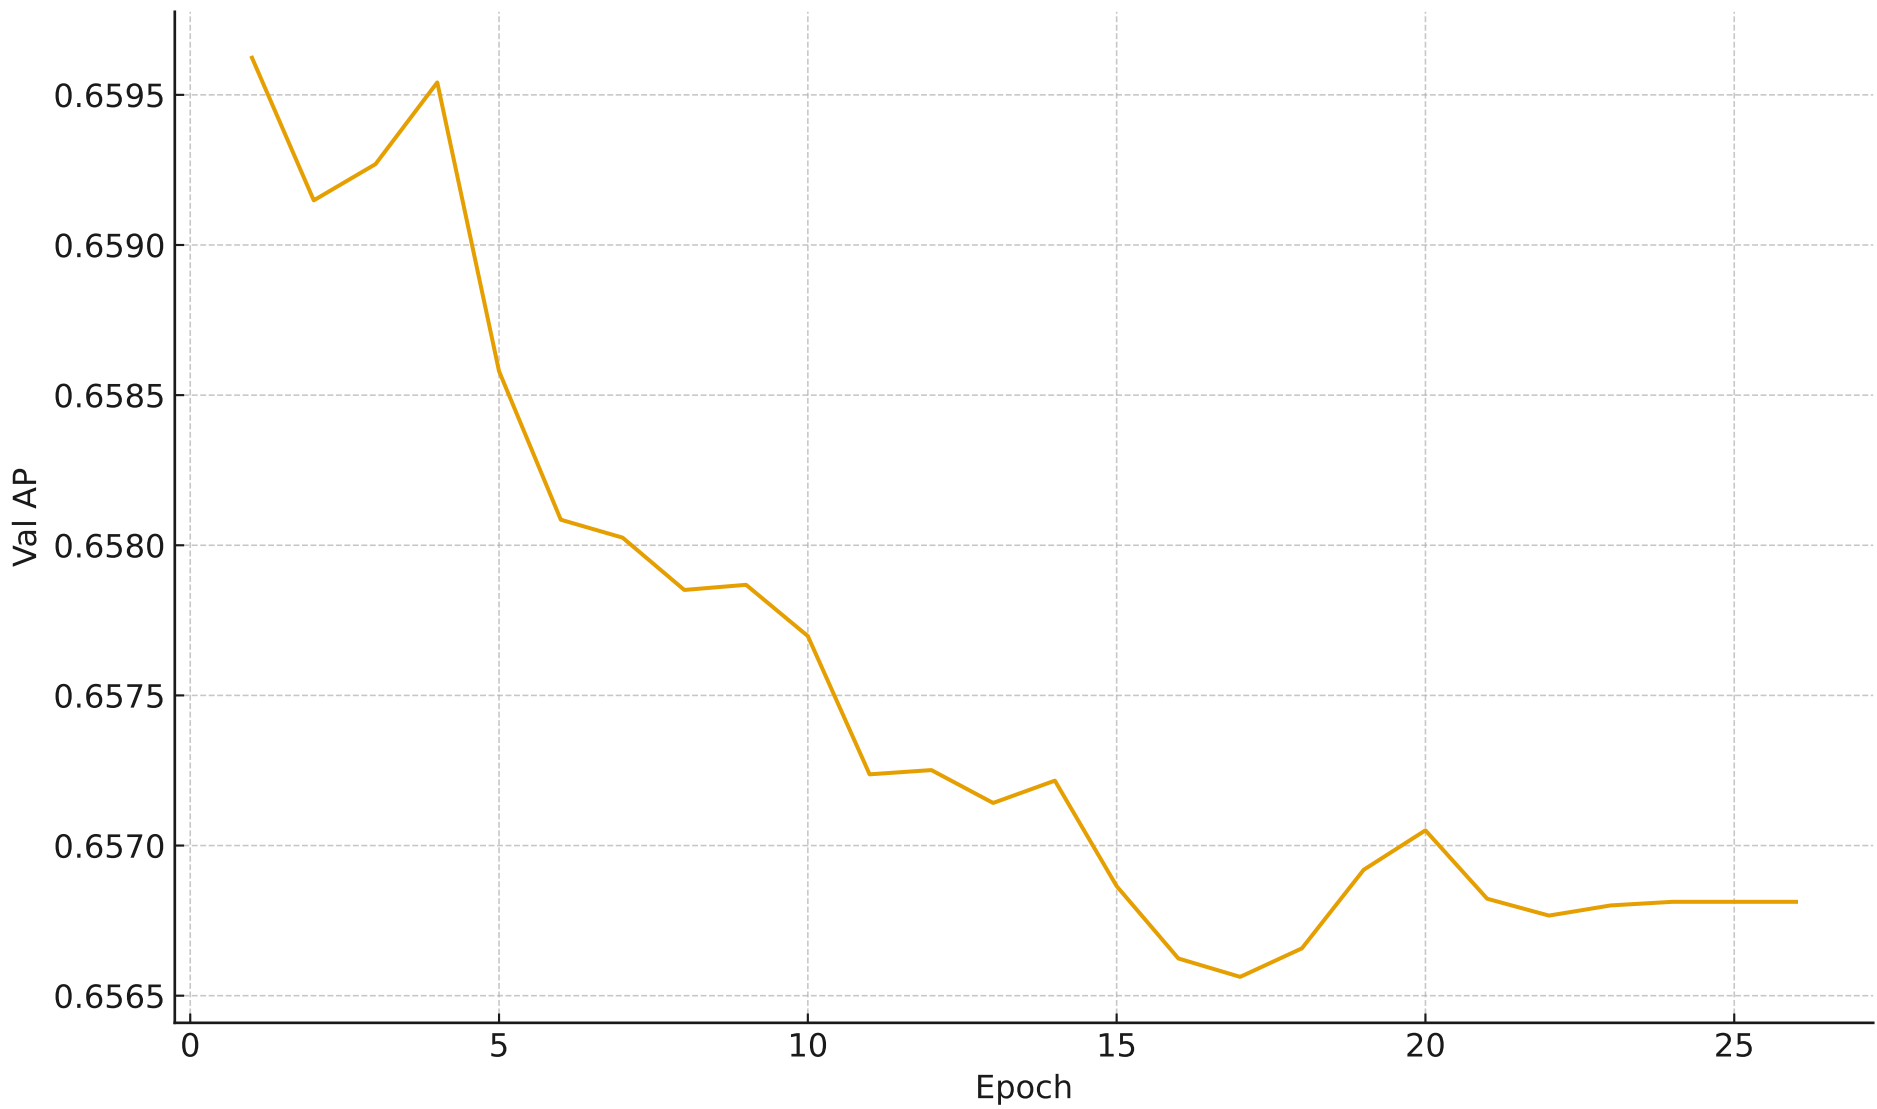

Supplement: supplementary_material [file valap_abl_high_sparsity.pdf › A4S25_anonymous_1234/paper/figures/valap_abl_high_sparsity.pdf]

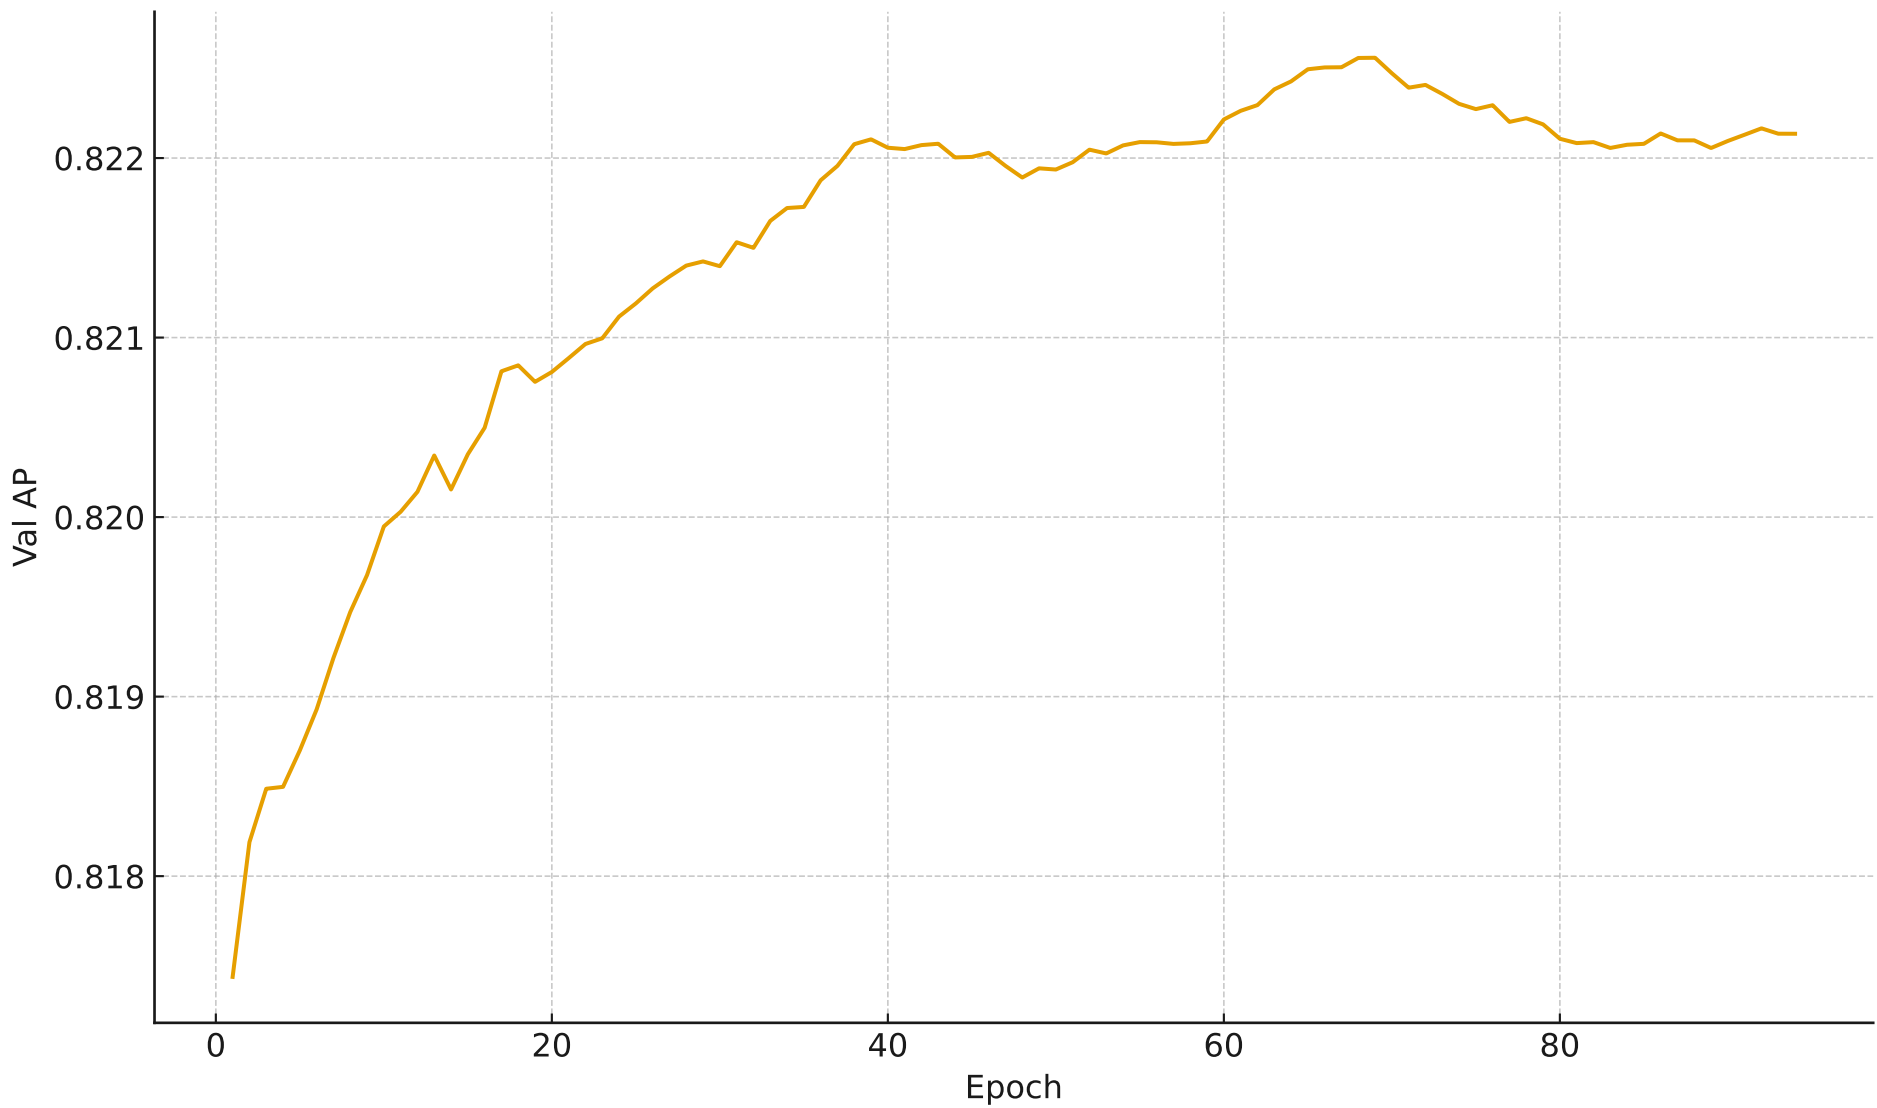

Supplement: supplementary_material [file valap_abl_no_uncertainty.pdf › A4S25_anonymous_1234/paper/figures/valap_abl_no_uncertainty.pdf]

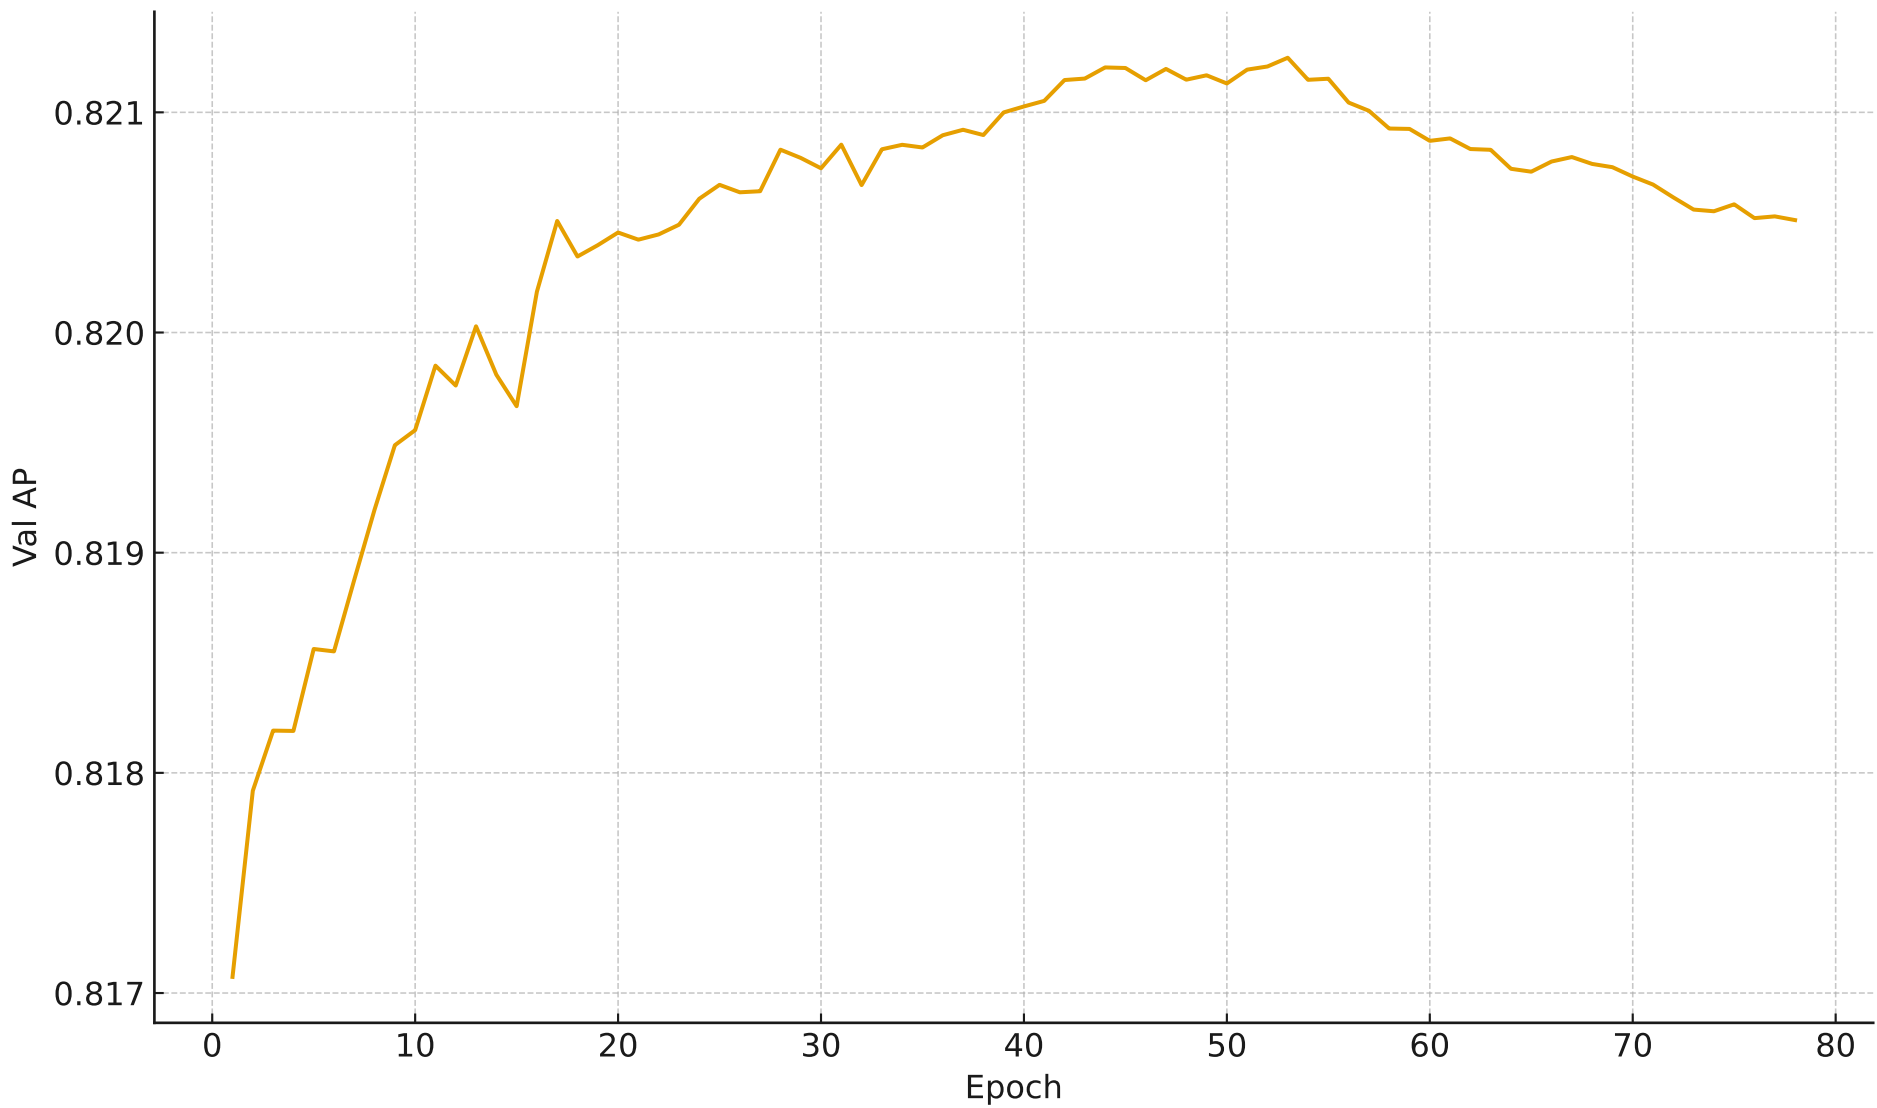

Supplement: supplementary_material [file valap_main.pdf › A4S25_anonymous_1234/paper/figures/valap_main.pdf]

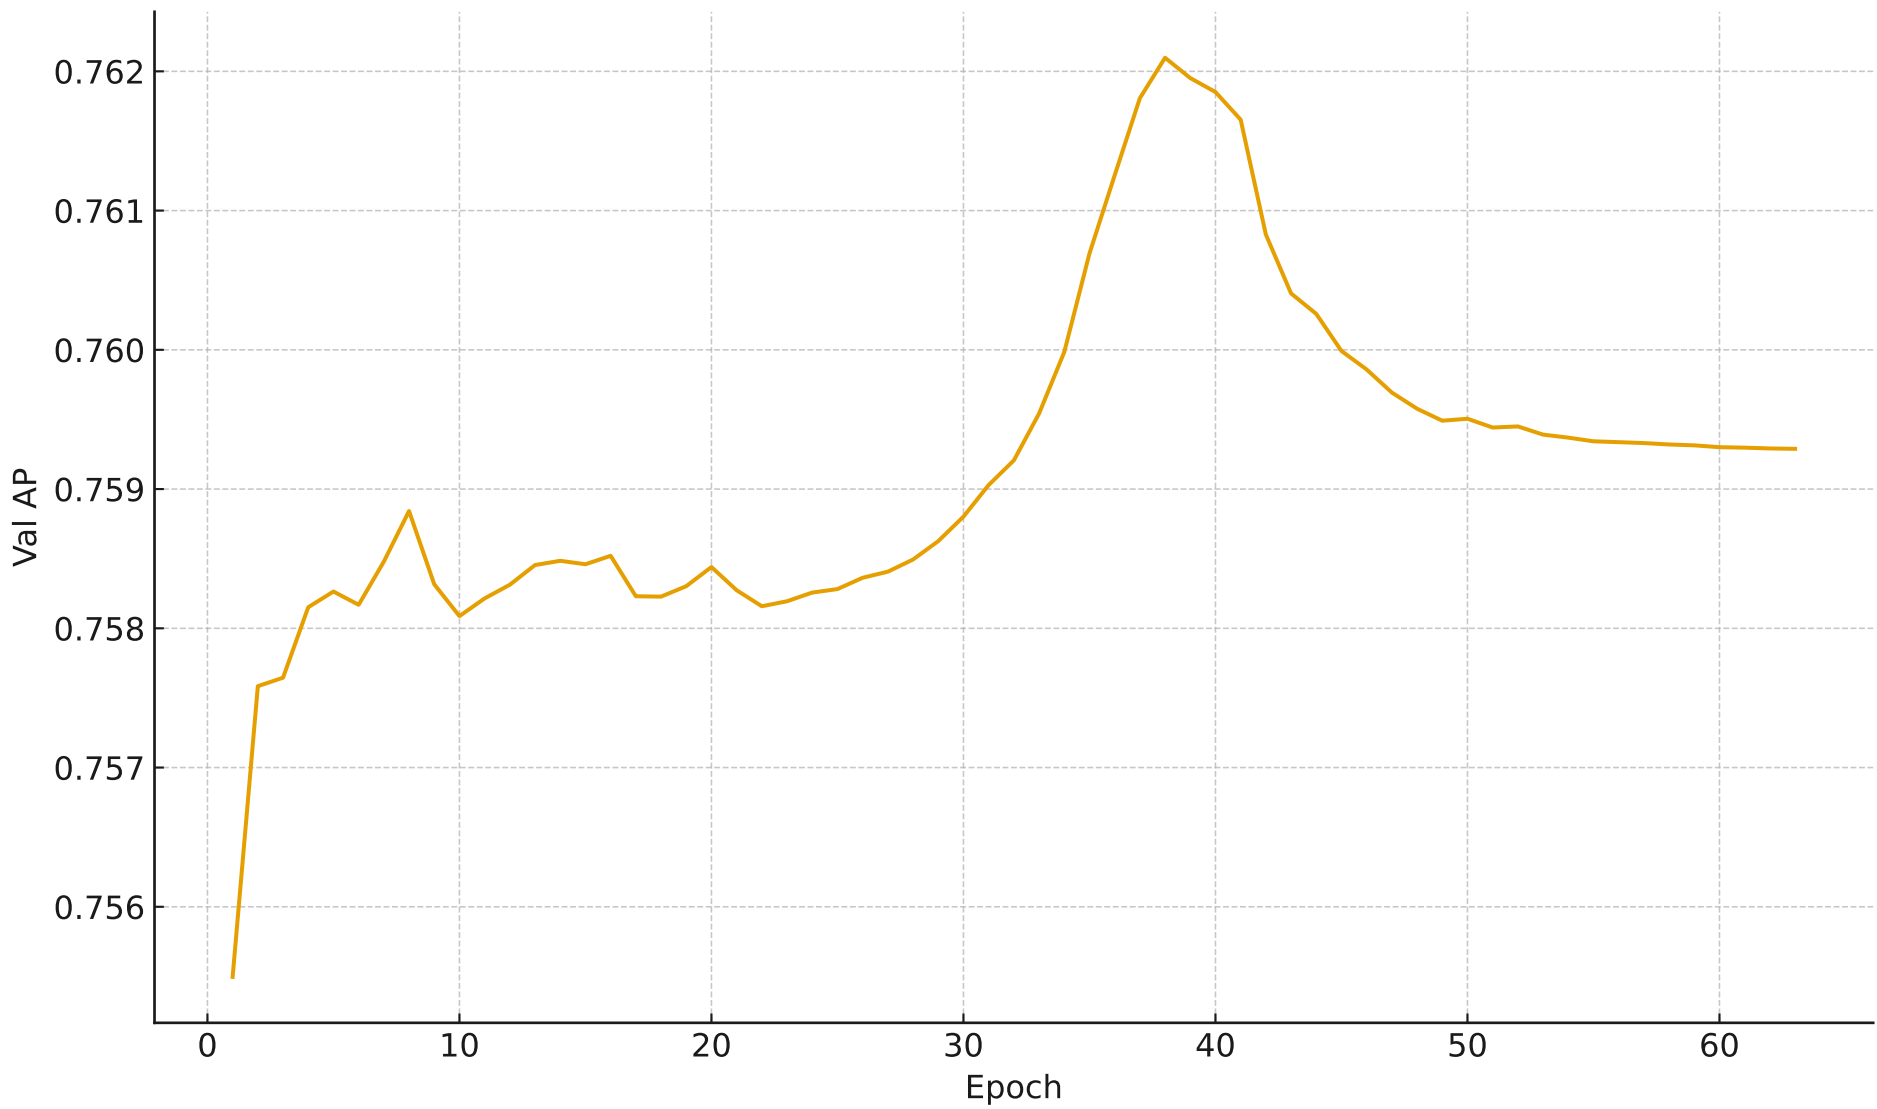

Supplement: supplementary_material [file valap_robS3_N0.0.pdf › A4S25_anonymous_1234/paper/figures/valap_robS3_N0.0.pdf]

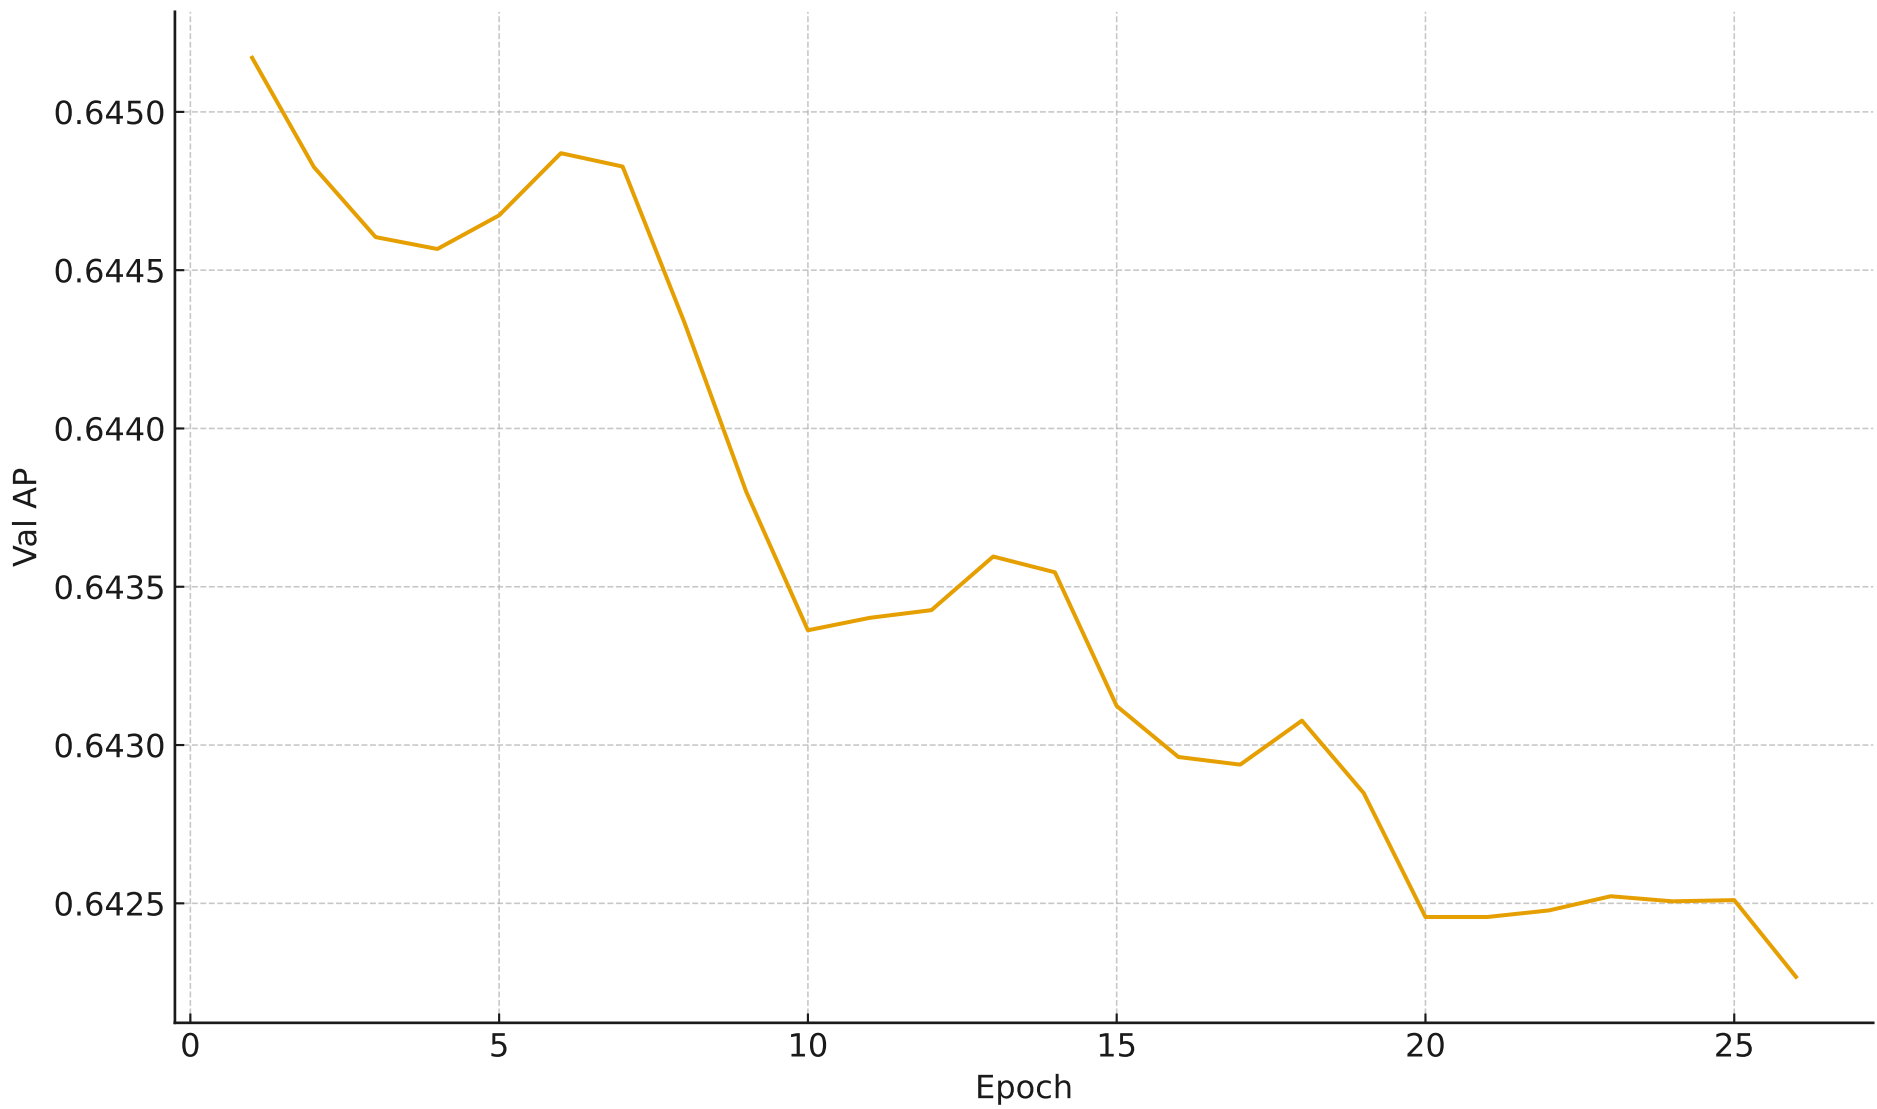

Supplement: supplementary_material [file valap_robS3_N0.1.pdf › A4S25_anonymous_1234/paper/figures/valap_robS3_N0.1.pdf]

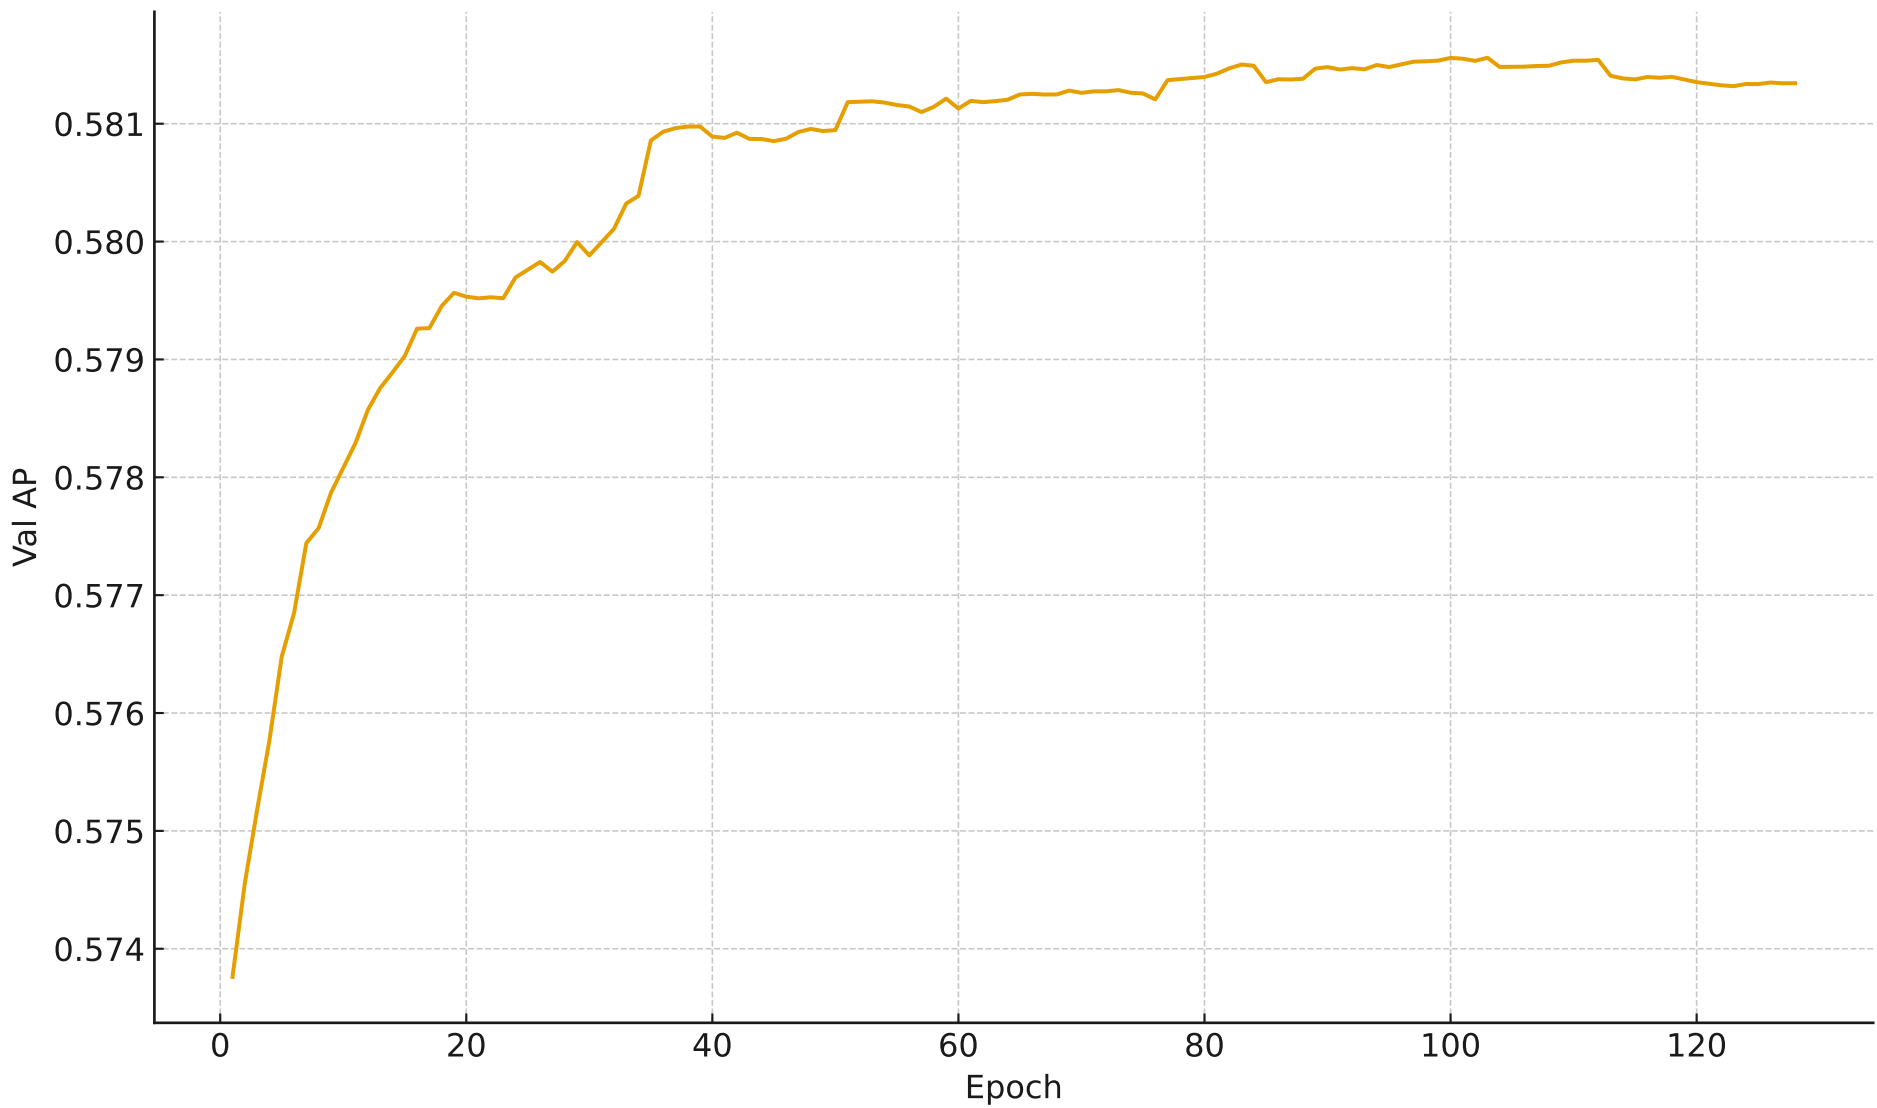

Supplement: supplementary_material [file valap_robS3_N0.2.pdf › A4S25_anonymous_1234/paper/figures/valap_robS3_N0.2.pdf]

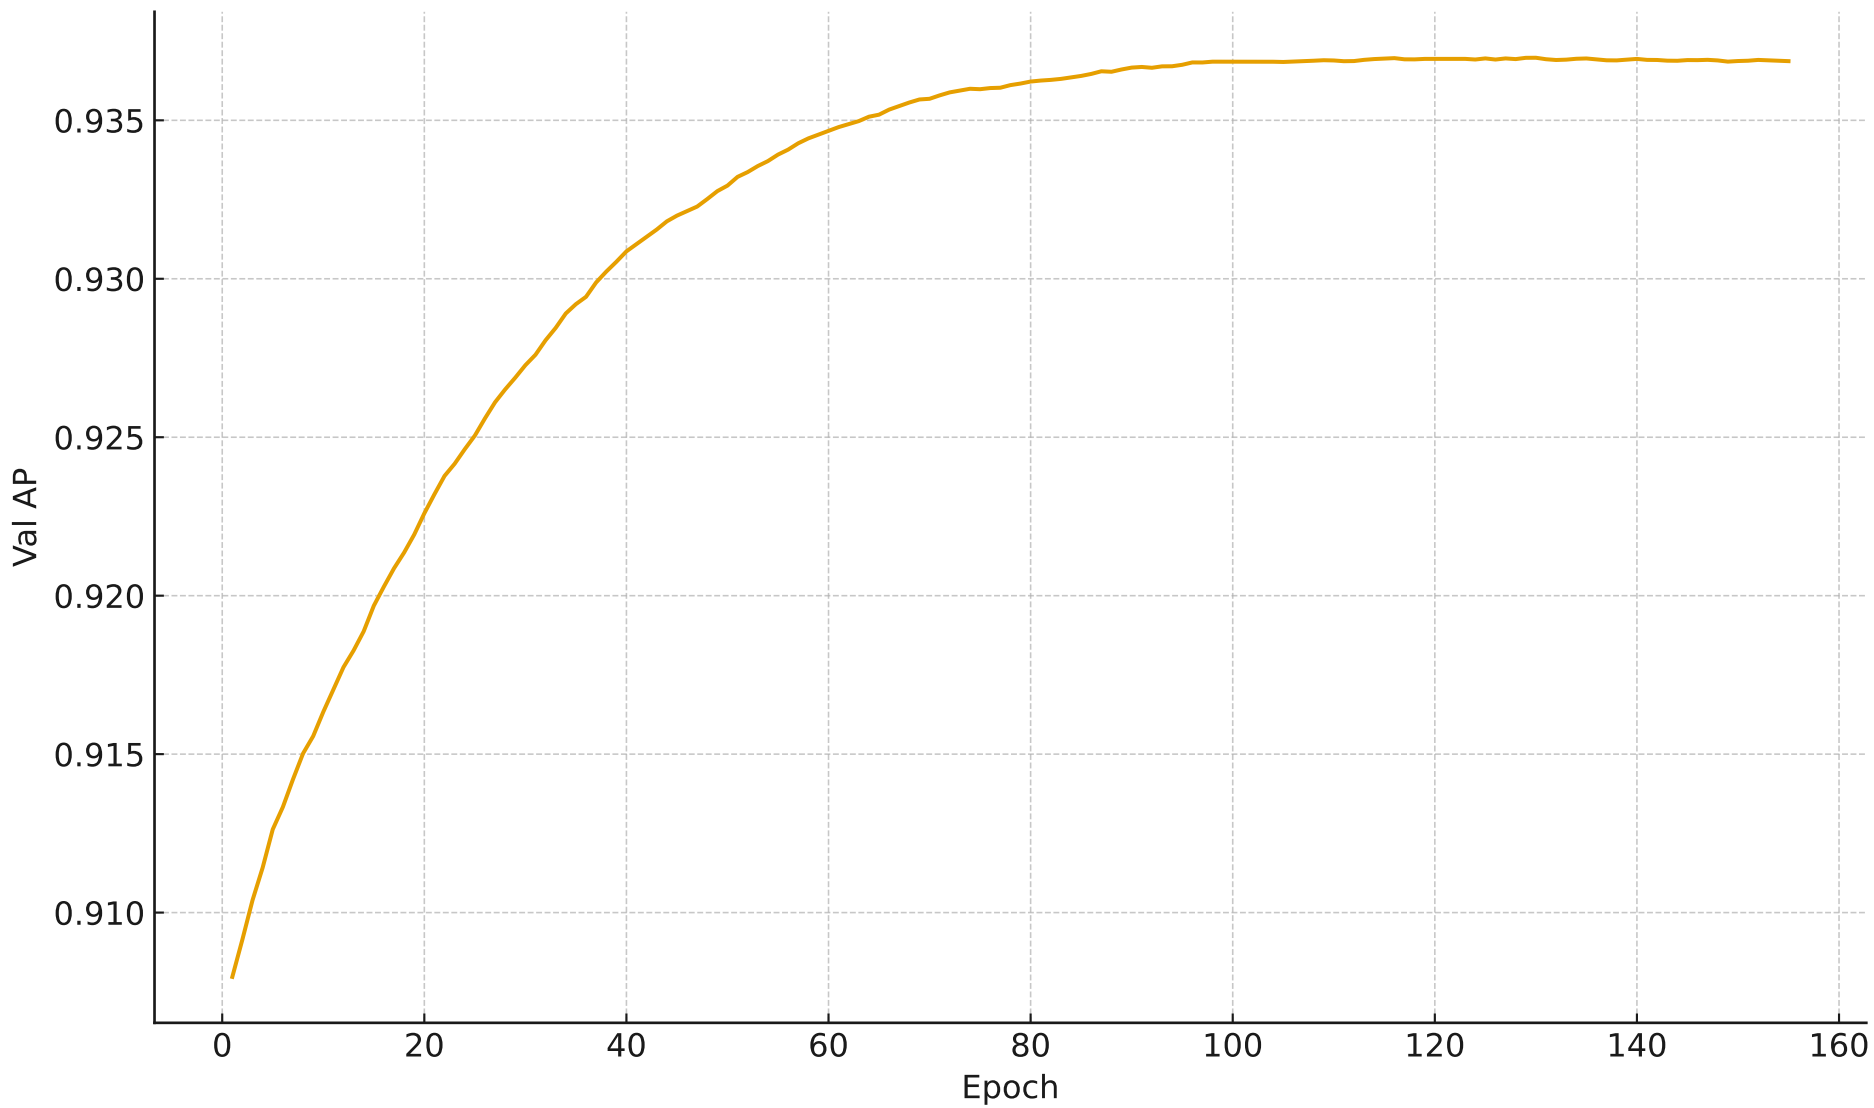

Supplement: supplementary_material [file valap_robS5_N0.0.pdf › A4S25_anonymous_1234/paper/figures/valap_robS5_N0.0.pdf]

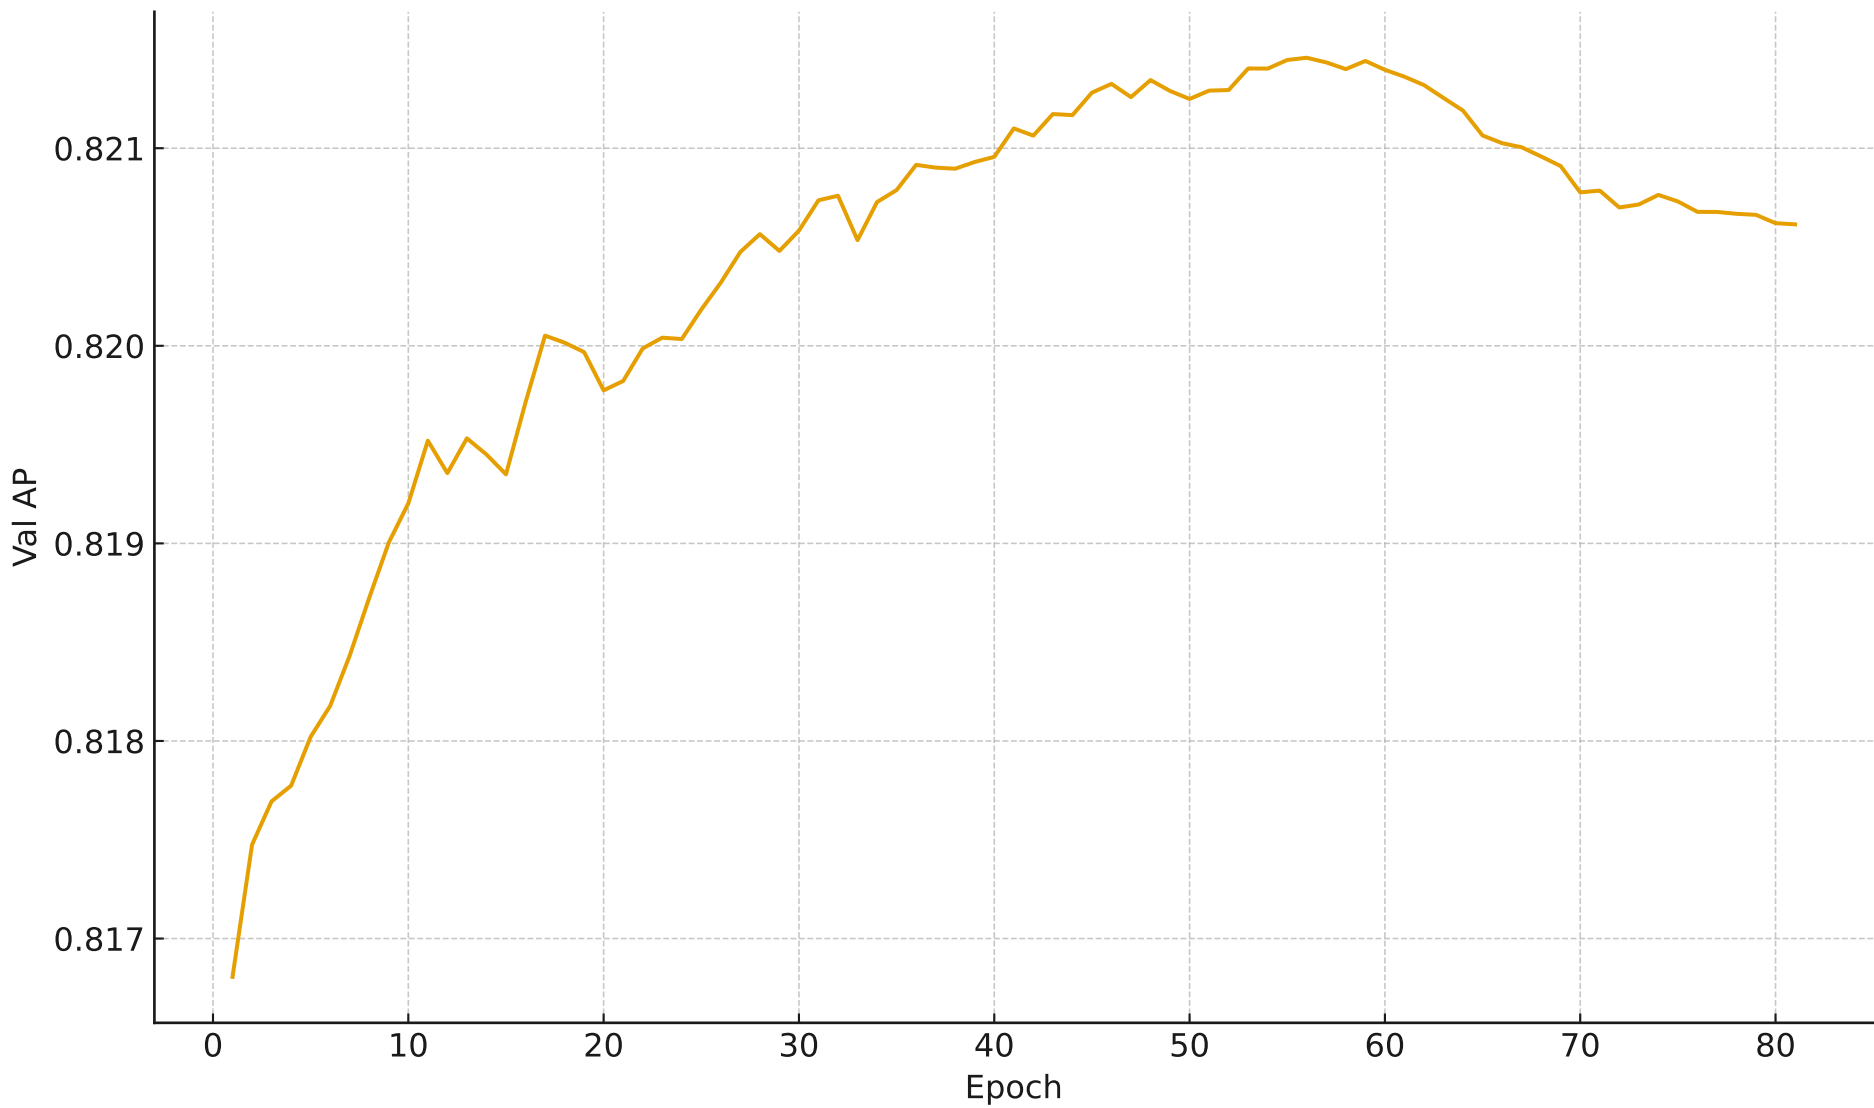

Supplement: supplementary_material [file valap_static.pdf › A4S25_anonymous_1234/paper/figures/valap_static.pdf]
